# Supplementary material for: IKKα Kinase Regulates the DNA Damage Response and Drives Chemo-resistance in Cancer
Source: PubMed Central journal article supplement — Mol Cell. 2019 Aug 22;75(4):669–682.e5. doi: 10.1016/j.molcel.2019.05.036 (PMC6715775; doi:10.1016/j.molcel.2019.05.036), 2019-08-22
Supplement: mmc1.pdf [file mmc1.pdf]

**Molecular Cell, Volume 75**

**Supplemental Information**

**IKK $\alpha$  Kinase Regulates the DNA Damage Response  
and Drives Chemo-resistance in Cancer**

**Carlota Colomer, Pol Margalef, Alberto Villanueva, Anna Vert, Irene Pecharroman, Laura Solé, Mónica González-Farré, Josune Alonso, Clara Montagut, Maria Martinez-Iniesta, Joan Bertran, Eva Borràs, Mar Iglesias, Eduard Sabidó, Anna Bigas, Simon J. Boulton, and Lluís Espinosa**

**Figure S1.**

**A**

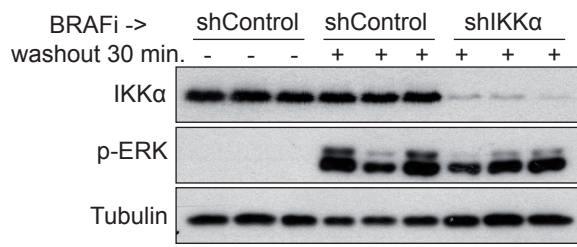

**B**

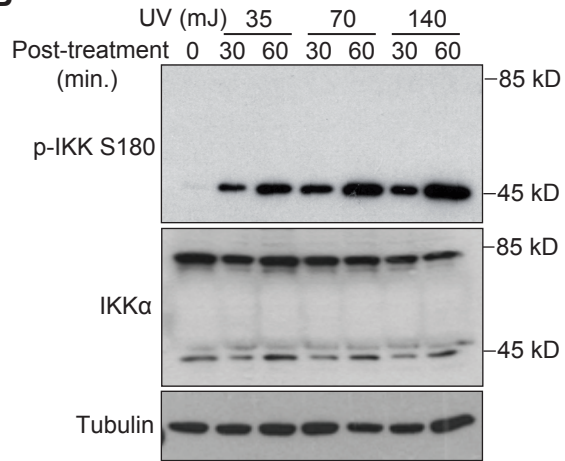

**Fig S1. Related to Figure 1.** (A) Western blot (WB) analysis of the HT29 cells used in the MS analysis transduced with sh-RNA control or sh-RNA against IKK $\alpha$ . All cell were treated with BRAF inhibitor for 16 hours, washed out (when indicated) and collected 30 minutes after BRAF inhibition release. (B) WB analysis of HT29 cells treated with the indicated doses of UV light and collected 30 or 60 minutes after exposure.

**Figure S2.**

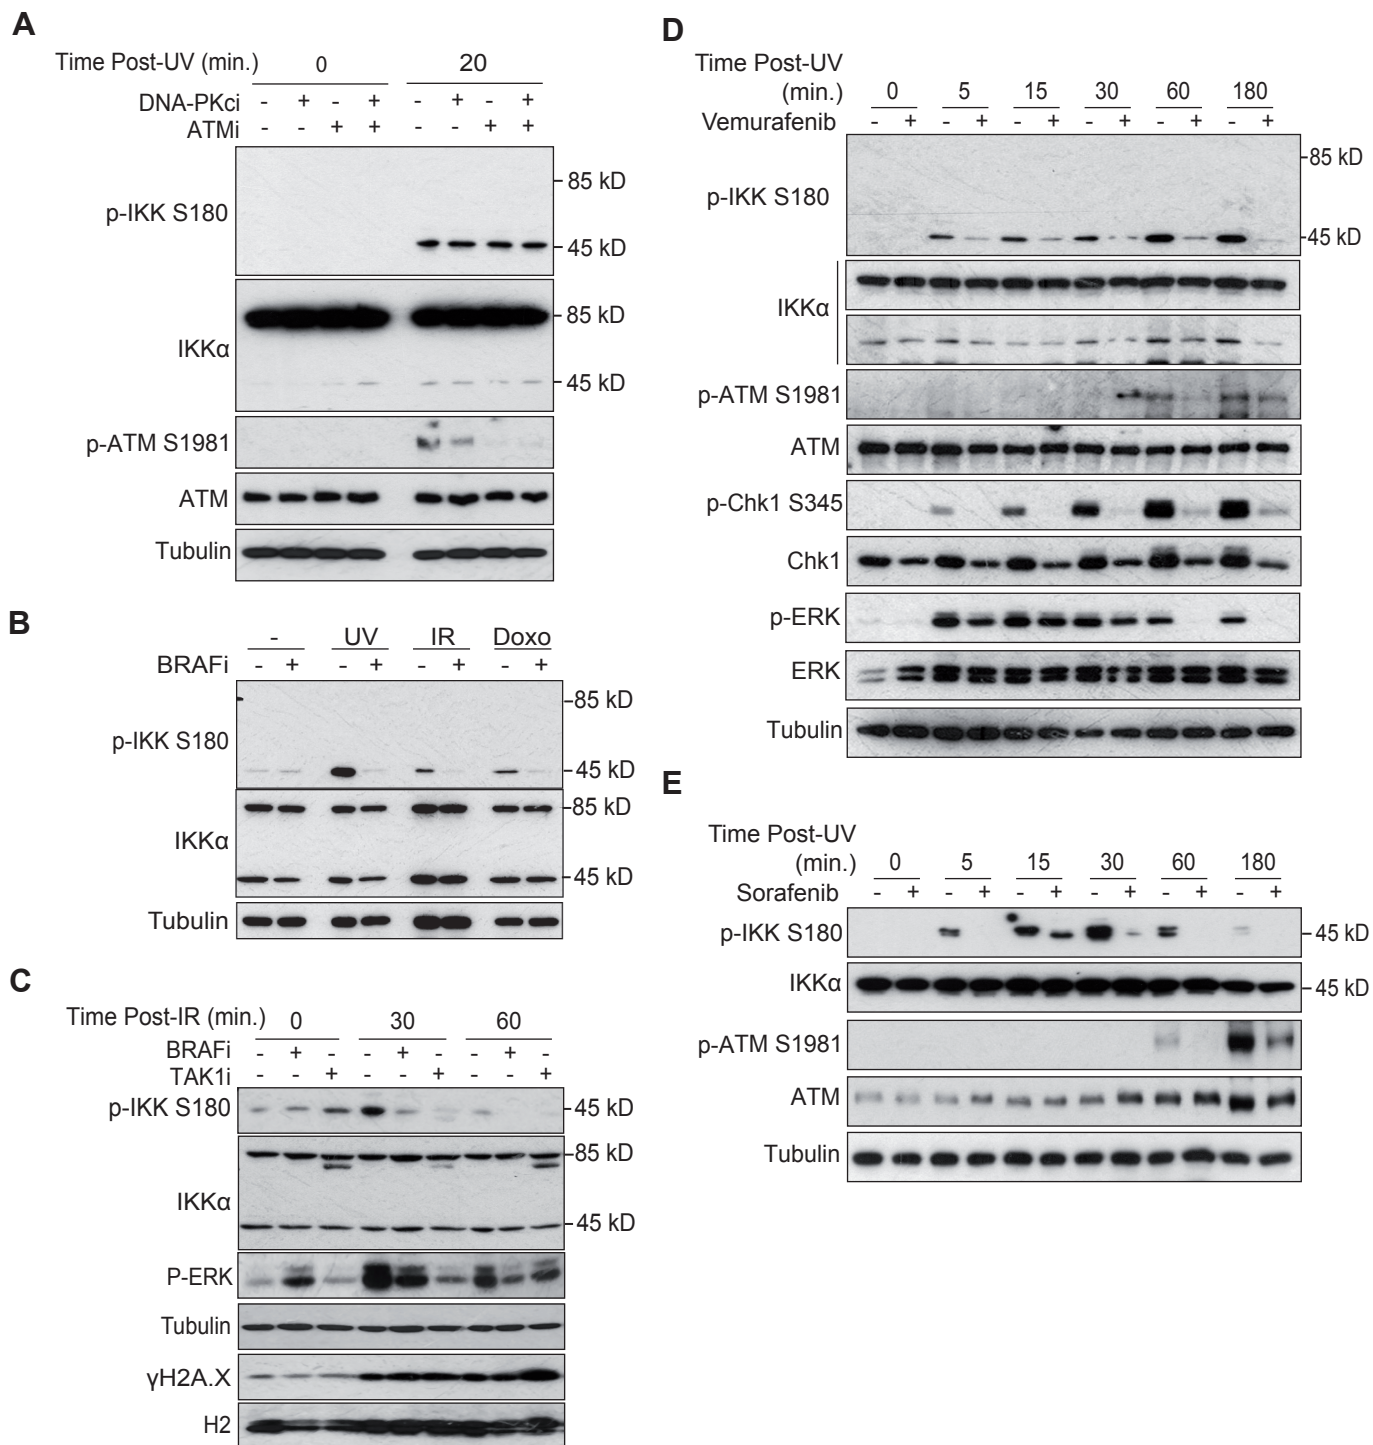

**Fig. S2. Related to Figure 2.** (A) WB analysis of HT29 cells treated for 16 hours with ATM and/or DNA-PKc inhibitors as indicated. (B) WB analysis of HT29 cells pretreated with the BRAF inhibitor AZ628 (16 hours, 10 $\mu$ M) and then exposed to the indicated damaging agents. (C) WB analysis of HT29 cells pretreated with the BRAF or TAK1 inhibitors for 16 hours and then exposed to IR for the indicated times. (D-E) WB analysis of HT29 cells treated with the BRAF inhibitors vemurafenib (16 hours, 10 $\mu$ M) (D) or sorafenib (16 hours, 1 $\mu$ M) (E) prior to exposure to UV light for the indicated time points.

**Figure S3.****A**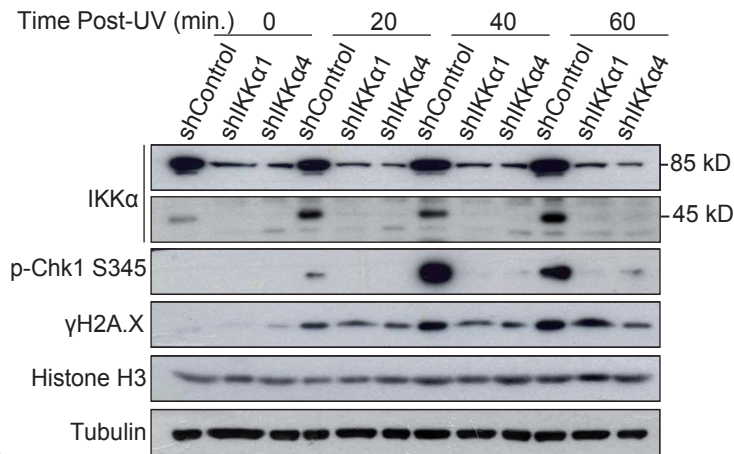**C**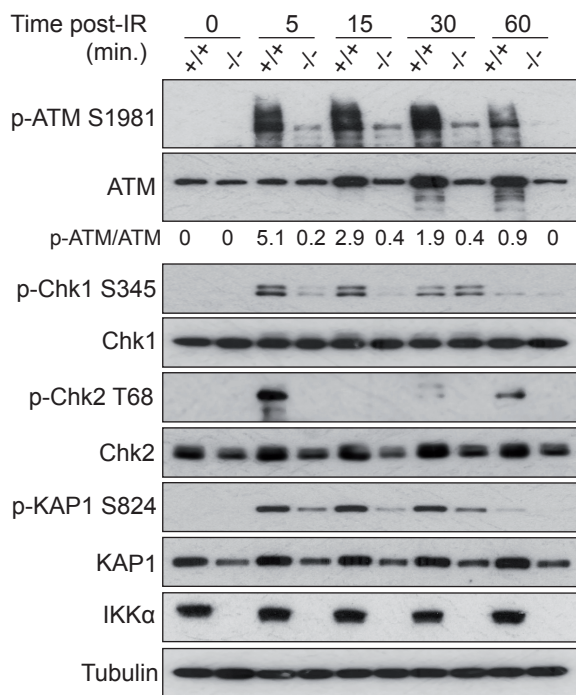**F**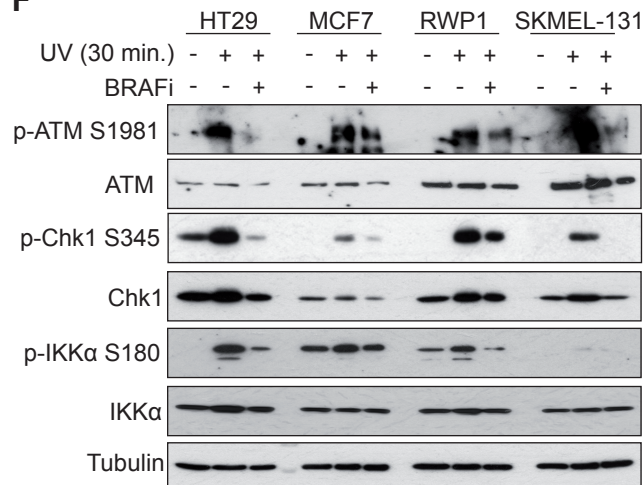**G**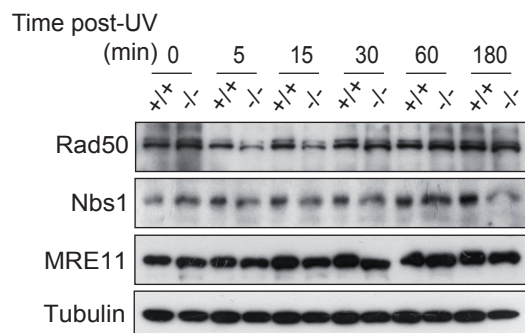**B**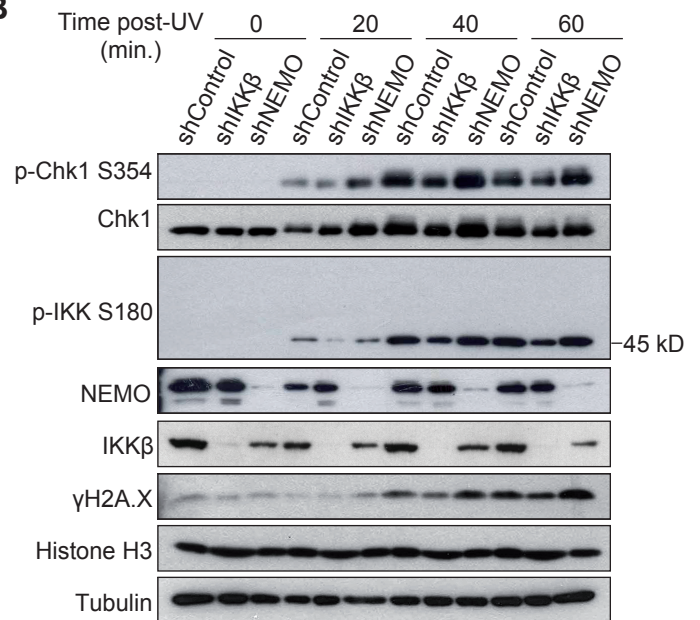**D**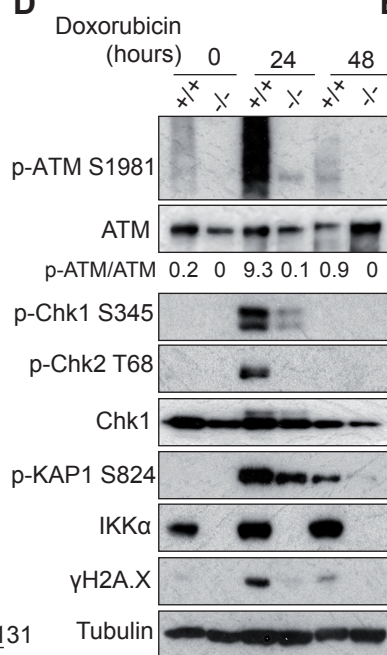**E**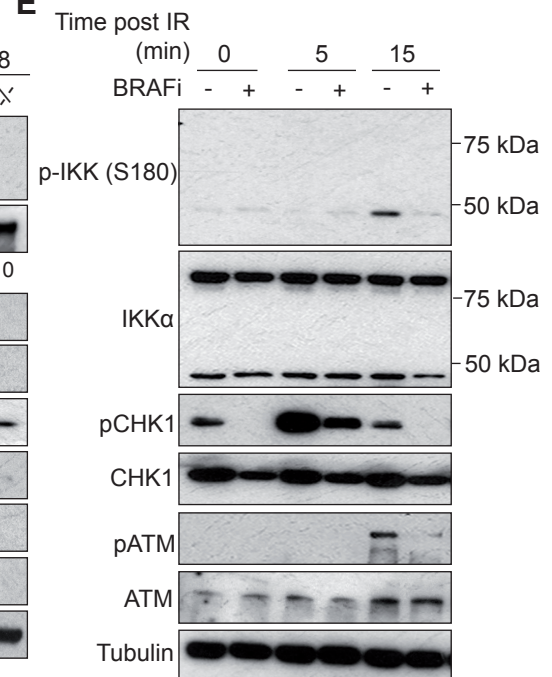**H**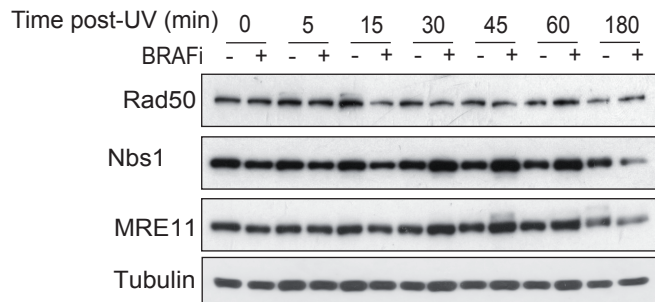**I**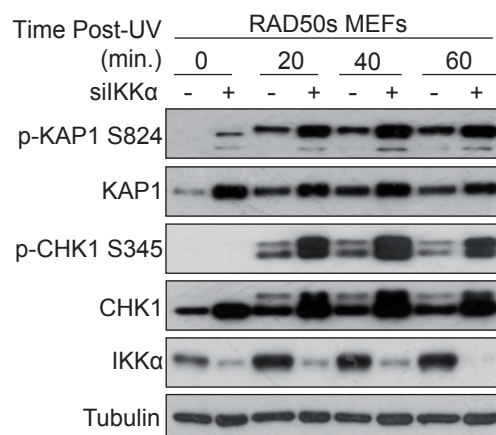

**Fig. S3. Related to Figure 3.** (A) WB analysis of HT29 cells transduced with shRNA control or 2 different IKK $\alpha$ -specific shRNAs, exposed to UV and collected at the indicated time points. (B) WB analysis of HT29 cells transduced with sh-RNA control or specific shRNAs against IKK $\beta$  and NEMO exposed to UV light and collected at the indicated time points. (C-D) WB analysis of *IKK $\alpha$*  WT (+/+) and *IKK $\alpha$*  KO (-/-) treated with IR (2Gy) (C) or doxorubicin (4  $\mu$ g/ml) (D) and collected at the indicated time points. (E) WB analysis of HT29 cells pretreated for 16 hours with AZ628 and then exposed to IR as indicated. (F) WB analysis of different cancer cell lines pretreated as in E and then exposed to UV light. (G-H) WB analysis of the indicated MRN elements in *IKK $\alpha$*  WT (+/+) and KO (-/-) control or UV-treated MEFs (G) or BRAF inhibitor-treated HT29 cells (H). (I) WB analysis of control and *IKK $\alpha$* -knocked down RAD50s MEFs treated as indicated.

**Figure S4.**

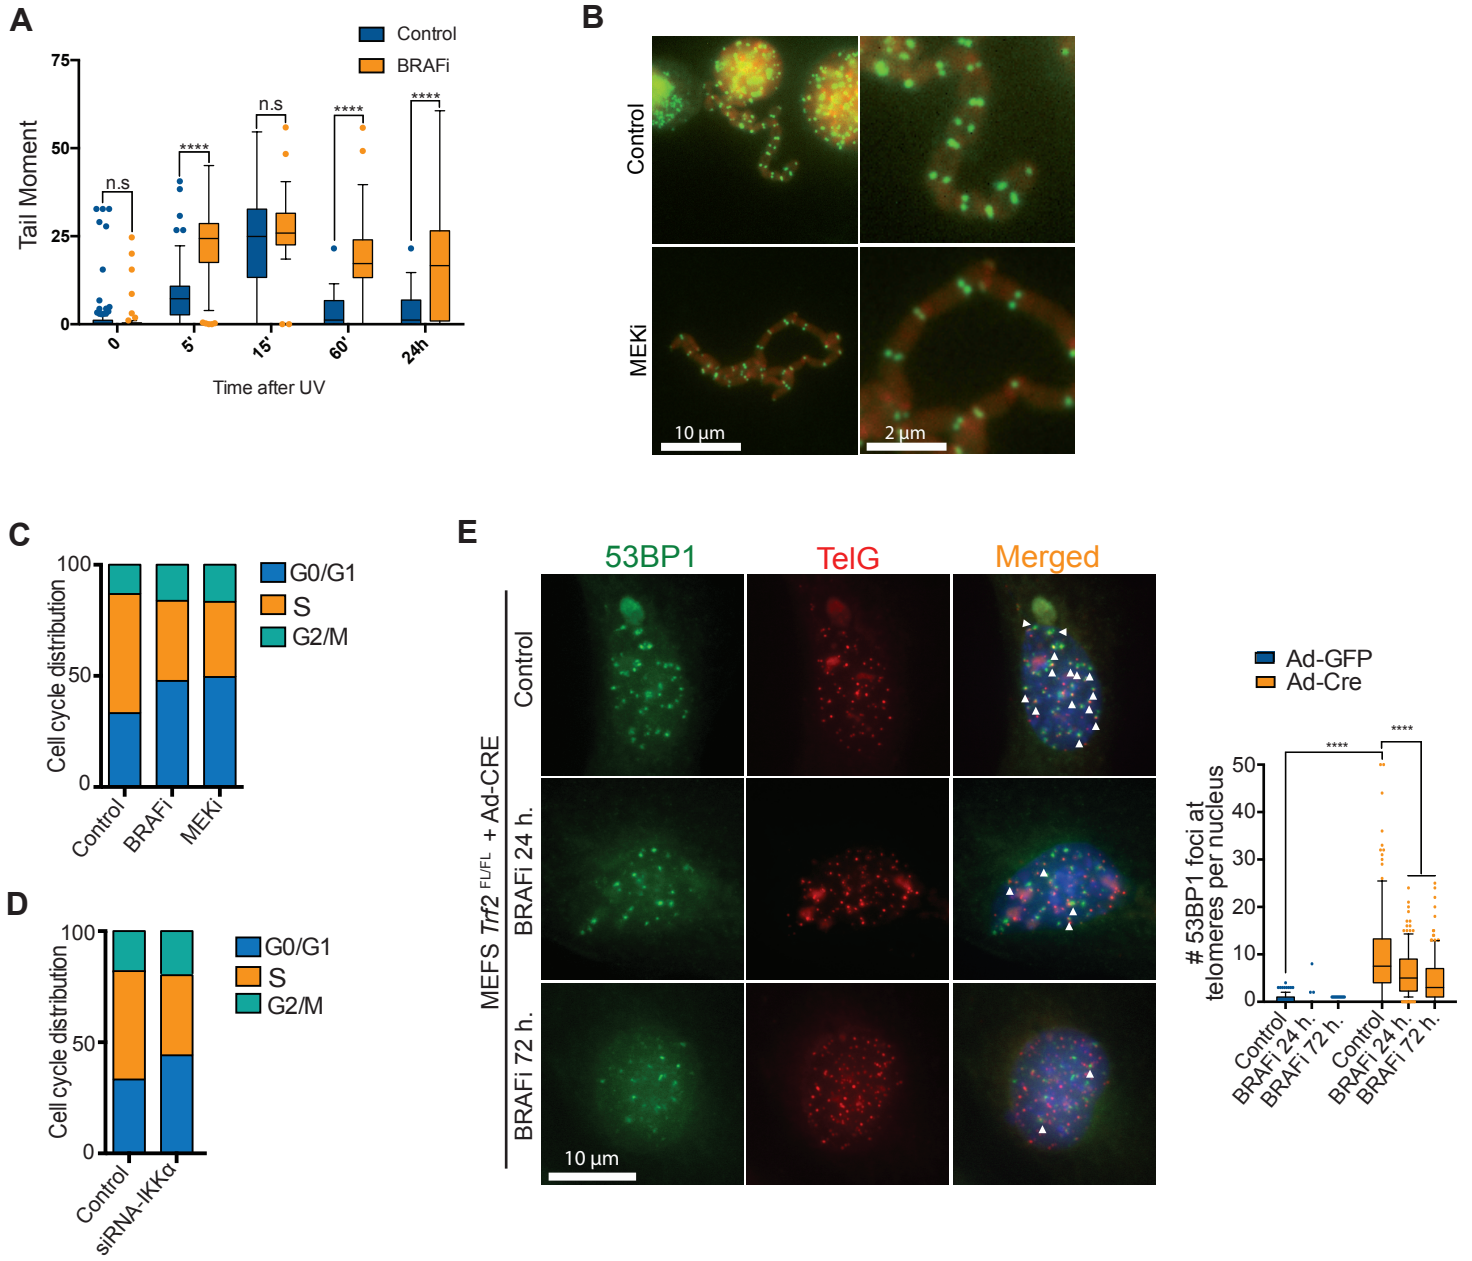



**Fig. S4. Related to Figure 4.** (A) Comet Assay of HT29 cells treated with AZ628 10 $\mu$ M (BRAFi) at the indicated time points after UV light (130mJ) (B) Representative images of FISH analysis from control and MEK-inhibited *Trf2* deficient cells using a telomeric probe (in green). (C-D) Cell cycle profiles of *Trf2* deficient cells treated as indicated (C) or transfected with specific siRNA against IKK $\alpha$  (D). (E) IF followed by telomeric FISH of *Trf2* deficient MEFs control or treated with BRAF inhibitor 24 or 72 hours. Quantification of 53BP1 colocalizing with telomeres is shown in the right panel. For statistical analysis in A, two-way ANOVA was used and the p-values are indicated as \*\*\*\* $p$ <0.0001.

**Figure S5.**

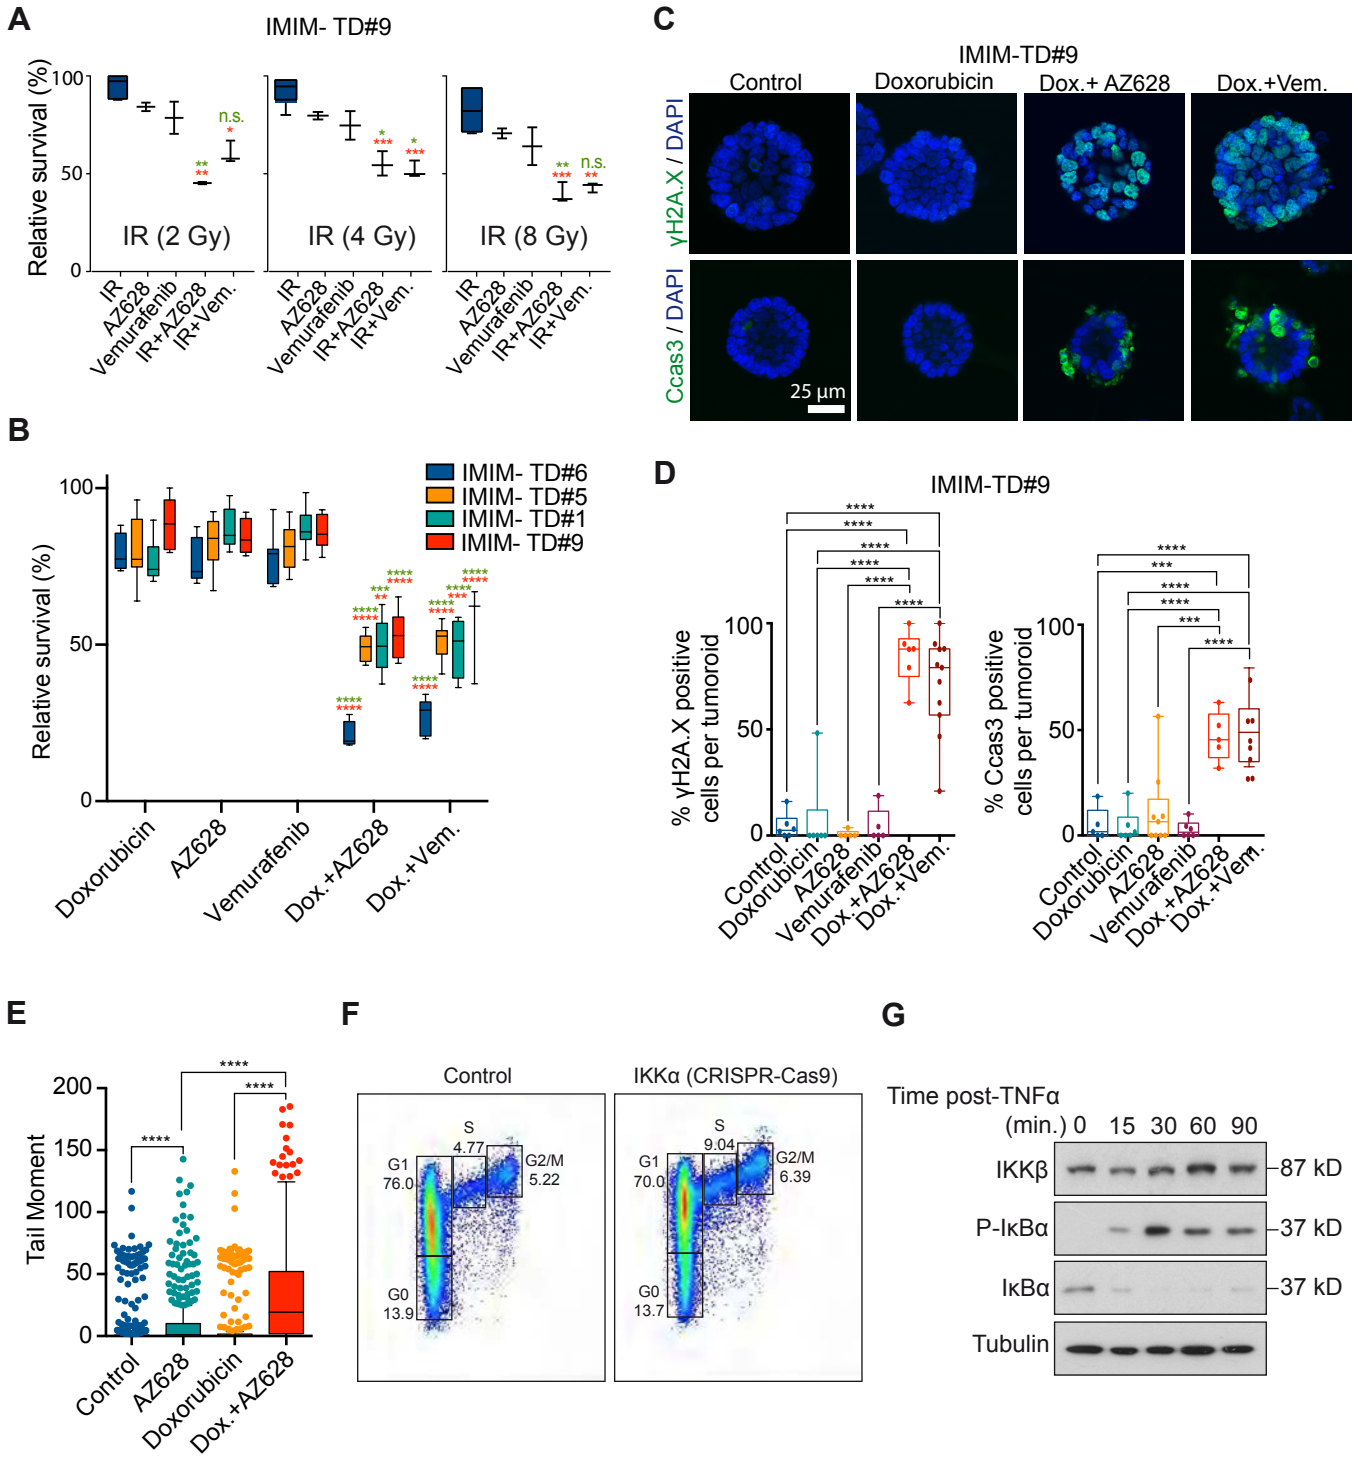

**Fig. S5. Related to Figure 5. (A-B)** Quantification of cell viability by CellTiter-Glo 3D cell viability assay in the indicated tumoroids after 72 hours of treatment at different doses of  $\gamma$ -irradiation (A) or drug combinations (B). **(C-D)** Representative images of  $\gamma$ H2A.X and cleaved caspase 3 IF in a representative tumoroid treated as indicated (C) and quantification of the percent of positive cells from 20 tumoroids per condition counted (D). **(E)** Comet Assay quantification from tumoroid IMIM-TD#9 treated with the indicated treatments for 24h. **(F)** Cell cycle profiles of the same tumoroid after CRISPR-Cas9-mediated IKK $\alpha$  depletion. **(G)** WB analysis of IKK $\alpha$ -depleted IMIM-TD#9 treated with TNF $\alpha$  as indicated. Statistical analysis in A, B, D and E was performed by unpaired t-test. In A and B comparison of compound treatments with single IR/Dox or BRAF inhibitors are shown in red and green, respectively. p-values are indicated as n.s.=non-significant, \* $p$ <0.05, \*\* $p$ <0.01, \*\*\* $p$ <0.001, \*\*\*\* $p$ <0.0001. In the legends Vem, vemurafenib; Dox, doxorubicin and IR,  $\gamma$ -radiation.

**Figure S6.**

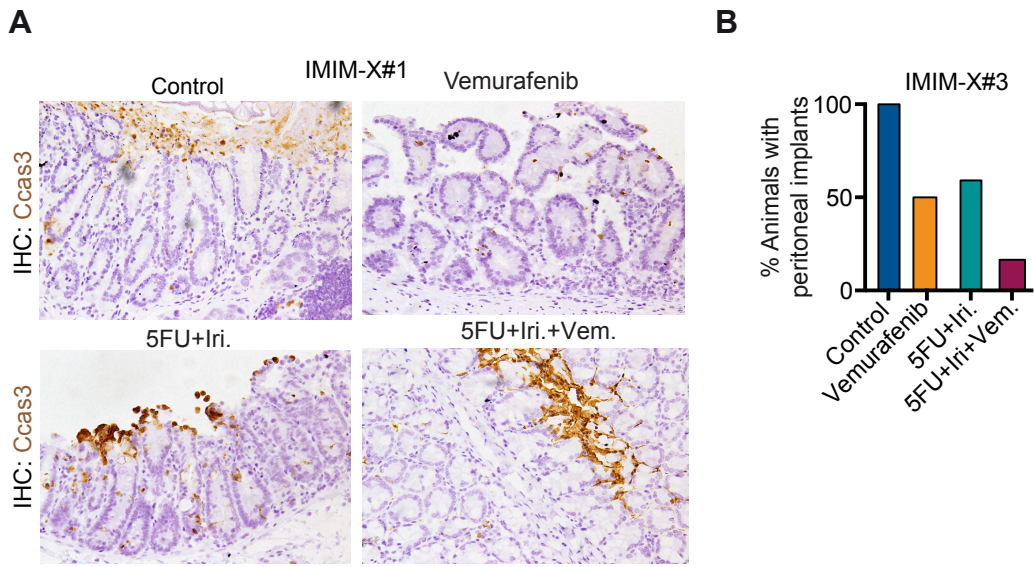

**Fig. S6. Related to Figure 6.** (A) Cleaved caspase 3 staining of normal colonic tissue from the indicated treated animals. (B) Graph indicating the percent of animals with detectable peritoneal implant in each group of treatment. In the figure: Vem, vemurafenib; 5FU, 5-fluorouracil; Dox, doxorubicin and Iri, irinotecan.
