# Supplementary material for: IKKα Kinase Regulates the DNA Damage Response and Drives Chemo-resistance in Cancer
Source: PubMed Central journal article supplement — Mol Cell. 2019 Aug 22;75(4):669–682.e5. doi: 10.1016/j.molcel.2019.05.036 (PMC6715775; doi:10.1016/j.molcel.2019.05.036), 2019-08-22
Supplement: mmc4.pdf [file mmc4.pdf]

# Molecular Cell

## IKK $\alpha$ Kinase Regulates the DNA Damage Response and Drives Chemo-resistance in Cancer

### Graphical Abstract

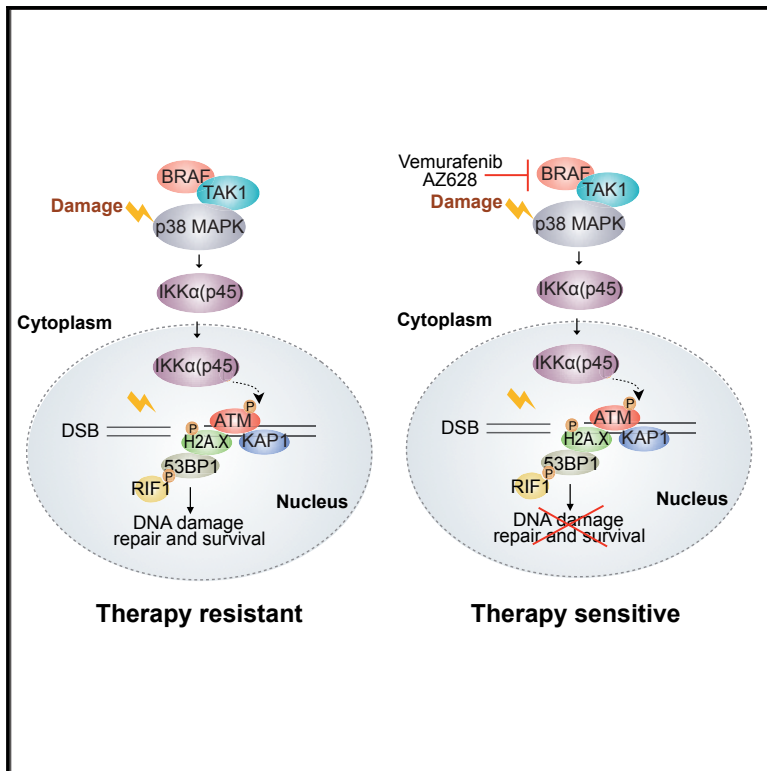

### Authors

Carlota Colomer, Pol Margalef, Alberto Villanueva, ..., Anna Bigas, Simon J. Boulton, Lluís Espinosa

### Correspondence

abigas@imim.es (A.B.), simon.boulton@crick.ac.uk (S.J.B.), lespinosa@imim.es (L.E.)

### In Brief

Colomer et al. discover that IKK $\alpha$  kinase contributes to the chemo- and radio-resistance of cancer cells by facilitating ATM activation and DNA repair. BRAF inhibitors prevent damage-induced IKK $\alpha$  activation, leading to the attenuation of ATM signaling and DNA repair. IKK $\alpha$  depletion or BRAF inhibitors combined with 5-FU and irinotecan synergistically enhance the killing of patient-derived xenograft tumors.

### Highlights

- IKK $\alpha$  kinase is activated by BRAF-TAK1-p38-MAPK in response to DNA damage
- Loss of IKK $\alpha$  or BRAF attenuates ATM signaling and compromises DNA repair
- Loss of IKK $\alpha$  or BRAF in combination with DNA damage potentiates tumor eradication
- Combination treatment of patient-derived tumors prolongs survival in mice

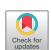

# IKK $\alpha$ Kinase Regulates the DNA Damage Response and Drives Chemo-resistance in Cancer

Carlota Colomer,<sup>1</sup> Pol Margalef,<sup>1,2</sup> Alberto Villanueva,<sup>3</sup> Anna Vert,<sup>1</sup> Irene Pecharroman,<sup>1</sup> Laura Solé,<sup>1</sup> Mónica González-Farré,<sup>4</sup> Josune Alonso,<sup>1</sup> Clara Montagut,<sup>5</sup> Maria Martinez-Iniesta,<sup>3</sup> Joan Bertran,<sup>6</sup> Eva Borràs,<sup>7,8</sup> Mar Iglesias,<sup>4</sup> Eduard Sabidó,<sup>7,8</sup> Anna Bigas,<sup>1,\*</sup> Simon J. Boulton,<sup>2,\*</sup> and Lluís Espinosa<sup>1,9,\*</sup>

<sup>1</sup>Cancer Research Program, Institut Mar d'Investigacions Mèdiques, CIBERONC, Hospital del Mar, Doctor Aiguader 88, Barcelona 08003, Spain

<sup>2</sup>DSB Repair Metabolism Laboratory, The Francis Crick Institute, London NW1 1AT, UK

<sup>3</sup>Translational Research Laboratory, Institut d'Investigació Biomèdica de Bellvitge (IDIBELL), Institut Català d'Oncologia, Hospitalet, Barcelona 08907, Spain

<sup>4</sup>Department of Pathology, Institut Mar d'Investigacions Mèdiques, CIBERONC, Universitat Autònoma de Barcelona, Barcelona 08003, Spain

<sup>5</sup>Department of Oncology, Institut Mar d'Investigacions Mèdiques, Universitat Pompeu Fabra, CIBERONC, Barcelona 08003, Spain

<sup>6</sup>Faculty of Science and Technology, Bioinformatics and Medical Statistics Group, University of Vic-Central University of Catalonia, Vic 08500, Spain

<sup>7</sup>Proteomics Unit, Centre for Genomic Regulation (CRG), Barcelona Institute of Science and Technology (BIST), Barcelona 08003, Spain

<sup>8</sup>Proteomics Unit, Universitat Pompeu Fabra, Barcelona 08003, Spain

<sup>9</sup>Lead Contact

\*Correspondence: [abigas@imim.es](mailto:abigas@imim.es) (A.B.), [simon.boulton@crick.ac.uk](mailto:simon.boulton@crick.ac.uk) (S.J.B.), [lespinosa@imim.es](mailto:lespinosa@imim.es) (L.E.)

<https://doi.org/10.1016/j.molcel.2019.05.036>

## SUMMARY

Phosphorylated IKK $\alpha$ (p45) is a nuclear active form of the IKK $\alpha$  kinase that is induced by the MAP kinases BRAF and TAK1 and promotes tumor growth independent of canonical NF- $\kappa$ B signaling. Insights into the sources of IKK $\alpha$ (p45) activation and its downstream substrates in the nucleus remain to be defined. Here, we discover that IKK $\alpha$ (p45) is rapidly activated by DNA damage independent of ATM-ATR, but dependent on BRAF-TAK1-p38-MAPK, and is required for robust ATM activation and efficient DNA repair. Abolishing BRAF or IKK $\alpha$  activity attenuates ATM, Chk1, MDC1, Kap1, and 53BP1 phosphorylation, compromises 53BP1 and RIF1 co-recruitment to sites of DNA lesions, and inhibits 53BP1-dependent fusion of dysfunctional telomeres. Furthermore, IKK $\alpha$  or BRAF inhibition synergistically enhances the therapeutic potential of 5-FU and irinotecan to eradicate chemotherapy-resistant metastatic human tumors *in vivo*. Our results implicate BRAF and IKK $\alpha$  kinases in the DDR and reveal a combination strategy for cancer treatment.

## INTRODUCTION

The DNA damage response (DDR) maintains genome stability by coordinating the cell cycle, DNA repair, and apoptosis in response to DNA lesions. Following DNA double-strand breaks (DSBs), the DDR is activated by ATM-dependent phosphorylation of numerous targets, including the effector kinase Chk2 and the histone H2A.X (called  $\gamma$ H2A.X when phosphorylated). Dependent on

cell-cycle stage, ATM coordinates the recruitment of 53BP1 or BRCA1 to damaged DNA, which determines DSB repair pathway choice and whether the lesion is repaired by non-homologous end joining (NHEJ) or homologous recombination (HR). In G1, 53BP1, RIF1, and the Sheldin co-factors oppose DSB resection, thereby favoring NHEJ and opposing HR (Panier and Boulton, 2014). Conversely, in S-G2, when an intact sister chromatid is available as a template following the completion of S phase, BRCA1 antagonizes 53BP1 and co-factors, thereby promoting a switch in DSB repair pathway to favor HR (Bothmer et al., 2010, 2011; Chapman et al., 2012a, 2012b; Escribano-Díaz et al., 2013; Zimmermann et al., 2013). In non-proliferating cells (cells in G0-G1 phases), classical NHEJ is the preferred option for DSB repair since there is no homology donor for HR. From yeast to mammals, multiple genotoxic agents such as UV, ionizing radiation (IR), reactive oxygen species, and 5-fluorouracil (5-FU) also induce the protein kinase p38, which plays an essential role in the regulation of cellular checkpoints (Alao and Sunnerhagen, 2008; Bulavin et al., 2001; Preta et al., 2010; Rouse et al., 1994). Recently, it was demonstrated that p38 $\alpha$  modulates the ATR pathway through direct phosphorylation of CtIP, which promotes therapy resistance in cancer cells (Canovas et al., 2018).

Contemporary treatments for most solid cancers involve surgery, radiotherapy, and combinations of chemotherapies, such as 5-FU, oxaliplatin, and irinotecan (Iri), which eradicate tumors by inducing DSBs in highly proliferative cells (reviewed in Brenner et al., 2014). However, it is well established that tumors also contain low proliferating and quiescent cells that are therapy resistant and contribute to tumor relapse and metastasis (Batlle and Clevers, 2017). Beyond non-specific DNA-damaging agents, antibodies targeting epidermal growth factor receptor (EGFR) constitute a second therapeutic option for cancer treatment, with mutations in KRAS and BRAF (two essential elements of the EGFR signaling pathway) that are predictive of treatment failure (Amado et al., 2008; Di Nicolantonio et al., 2008) and poor prognosis

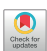

(Richman et al., 2009). Based on the structural characteristics of mutated RAS, the possibility of developing small molecules that revert its activation remains a significant challenge (Vetter and Wittinghofer, 2001). Thus, there is a growing interest in developing BRAF inhibitors and other inhibitors of the mitogen-activated protein kinase (MAPK) pathway that are being used for treating BRAF-mutated metastatic melanoma (Hu-Lieskovan et al., 2015; Ribas et al., 2014). However, recent BRAF inhibitor trials in cancer patients carrying BRAF-mutated tumors have produced largely negative results (Hong et al., 2016).

The nuclear factor  $\kappa$ B (NF- $\kappa$ B) signaling pathway regulates innate and acquired immunity and is essential for most physiological processes but also for cancer progression (reviewed in Zhang et al., 2017). Multiple extracellular stimuli, including the inflammatory cytokines tumor necrosis factor  $\alpha$  (TNF- $\alpha$ ) and interleukin 1 $\beta$  (IL-1 $\beta$ ), induce NF- $\kappa$ B through a series of signaling events that lead to the phosphorylation and activation of a kinase complex that consists of IKK $\alpha$ , IKK $\beta$ , and IKK $\gamma$ /NEMO. The IKK $\alpha$  subunit is dispensable for NF- $\kappa$ B activation, but it has been found to exert multiple pro-tumorigenic functions. Several studies have demonstrated that IKK $\alpha$  enhances the metastatic activity of prostate tumors (Luo et al., 2007) and squamous cell carcinomas (Toll et al., 2015) by regulating the Maspin gene. Epithelial IKK $\alpha$  is required for the initiation and progression of intestinal adenomas (Colomer et al., 2018) and lung adenocarcinomas (Vreka et al., 2018) in mice. Recently, we identified a nuclear active form of the IKK $\alpha$  kinase, IKK $\alpha$ (p45), which is localized in the nuclear compartment of cancer cells. IKK $\alpha$ (p45) induces the phosphorylation of histone H3 and nuclear co-repressors, which is dependent on its interaction with non-activated full-length IKK $\alpha$  and promotes tumor growth independent of canonical NF- $\kappa$ B signaling (Margalef et al., 2012). The phosphorylation and activation of IKK $\alpha$ (p45) require the MAP kinases BRAF and TAK1 and take place in proximity to the endosomal compartment (Margalef et al., 2012, 2015). The kinase p38 $\alpha$  has also been linked to TAK1 (MAP3K7) and IKK activation in several situations, including the DDR (Chen et al., 2015; Hindi et al., 2018; Yang et al., 2011). In fact, exposure to chemotherapeutic agents leads to the activation of canonical NF- $\kappa$ B, downstream of ATM and NEMO (Wu et al., 2006).

Here, we make the unexpected discovery that the activity of BRAF and IKK $\alpha$  kinases is important for a proper DDR and for efficient DNA repair. In response to DNA damage, IKK $\alpha$ (p45) is rapidly activated by phosphorylation on Ser180, it translocates to the nucleus, and it co-localizes with 53BP1 at sites of damage. BRAF inhibition or loss of IKK $\alpha$ (p45) attenuates ATM activation and downstream checkpoint signaling, reduces the phosphorylation of key DDR factors, and compromises DNA repair, including 53BP1-dependent end joining. Finally, we show that BRAF inhibition or IKK $\alpha$ (p45) depletion synergizes with DNA-damaging chemotherapeutic agents to induce tumor eradication in mice, thus revealing a potential therapeutic strategy for cancer treatment.

## RESULTS

### IKK $\alpha$ (p45) Is Rapidly Activated in Response to DNA Damage

IKK $\alpha$ (p45) is a largely uncharacterized kinase with no known substrates. In an attempt to identify processes that are regulated by

IKK $\alpha$ , we sought to identify its kinase substrates through quantitative phospho-proteomic analysis of control and IKK $\alpha$ -knock-down HT29 cells. Unexpectedly, this approach identified several DDR pathway components, including 53BP1 and KAP1 (also known as TRIM28 or transcription intermediary factor 1 $\beta$  [TIF-1 $\beta$ ]), as proteins whose phosphorylation depends on IKK $\alpha$  (see experimental strategy in Figure S1A and the results in Table S1). This observation raised the possibility that IKK $\alpha$  may function at some level in the DDR.

To examine this possibility, we exposed HT29 cells to UV light and performed western blot analysis at different time points. UV treatment rapidly induced the phosphorylation of nuclear IKK $\alpha$ (p45) on Ser180 (referred to as p-IKK $\alpha$ (p45)), which preceded the phosphorylation of canonical DDR proteins, including Chk1, KAP1, and H2A.X (Figure 1A). Different UV doses comparably increased p-IKK $\alpha$ (p45) levels in the nucleus (Figure S1B), and this occurred in a range of different cancer cells independent of the mutational status of KRAS or BRAF (Figures 1B and 1C). To determine whether the induction of nuclear p-IKK $\alpha$ (p45) extends beyond UV to other DNA-damaging agents, we also examined p-IKK $\alpha$ (p45) in response to IR and the topoisomerase II inhibitor, etoposide. p-IKK $\alpha$ (p45) was rapidly induced in response to all of the tested DNA-damaging agents, although the largest effect was produced by UV treatment (Figure 1D). Since p-IKK $\alpha$ (p45) is the nuclear form of activated IKK $\alpha$ , we asked whether it is also recruited to sites of DNA damage. Immunofluorescence analysis revealed that p-IKK $\alpha$ (p45) co-localized with 53BP1 in laser-induced stripes (Figure 1E). These results reveal that p-IKK $\alpha$ (p45) is rapidly induced by and accumulates at sites of DNA damage, which raised the possibility that p-IKK (p45) may contribute in some way to the regulation of the DDR pathway.

### p38-MAPK Activates IKK $\alpha$ in Response to DNA Damage

The activation of ATM or ATR is an early event in the cellular response to DNA damage, both kinases being essential for initiating the DDR signaling cascade in response to different DNA lesions. To determine whether ATM or ATR contributes to the induction of nuclear p-IKK $\alpha$ (p45) in response to DNA damage, we treated UV-irradiated cells with selective ATM or ATR inhibitors and blotted for IKK $\alpha$ (p45) Ser180 phosphorylation. While ATM and ATR inhibitors effectively abolished the phosphorylation of their downstream effector kinases Chk2 (pT68) and Chk1 (pS345; Figure 2A), this had no impact on the damage-induced Ser180 phosphorylation of IKK $\alpha$ (p45). We also considered the possibility that the DNA-dependent protein kinase, catalytic subunit (DNA-PKcs) may act redundantly to phosphorylate IKK $\alpha$ (p45) in response to damage. However, the combined inhibition of ATM and DNA-PKc also had no effect on the induction of p-IKK $\alpha$ (p45) following damage (Figure S2A). These data, coupled with the fact that p-IKK $\alpha$ (p45) induction precedes many other early damage markers, including  $\gamma$ H2A.X and Chk1 (Figure 1A), suggested that IKK $\alpha$ (p45) phosphorylation either occurs upstream of or parallel to ATM-ATR activation.

Since IKK $\alpha$  is known to be activated by BRAF, TAK1, and p38-MAPK, we explored whether these kinases may also promote p-IKK $\alpha$ (p45) activation following UV treatment. Selective inhibitors of TAK1, BRAF, or p38-MAPK (but not MEK1) effectively abolished IKK $\alpha$ (p45) Ser180 phosphorylation in response to UV (Figure 2B).

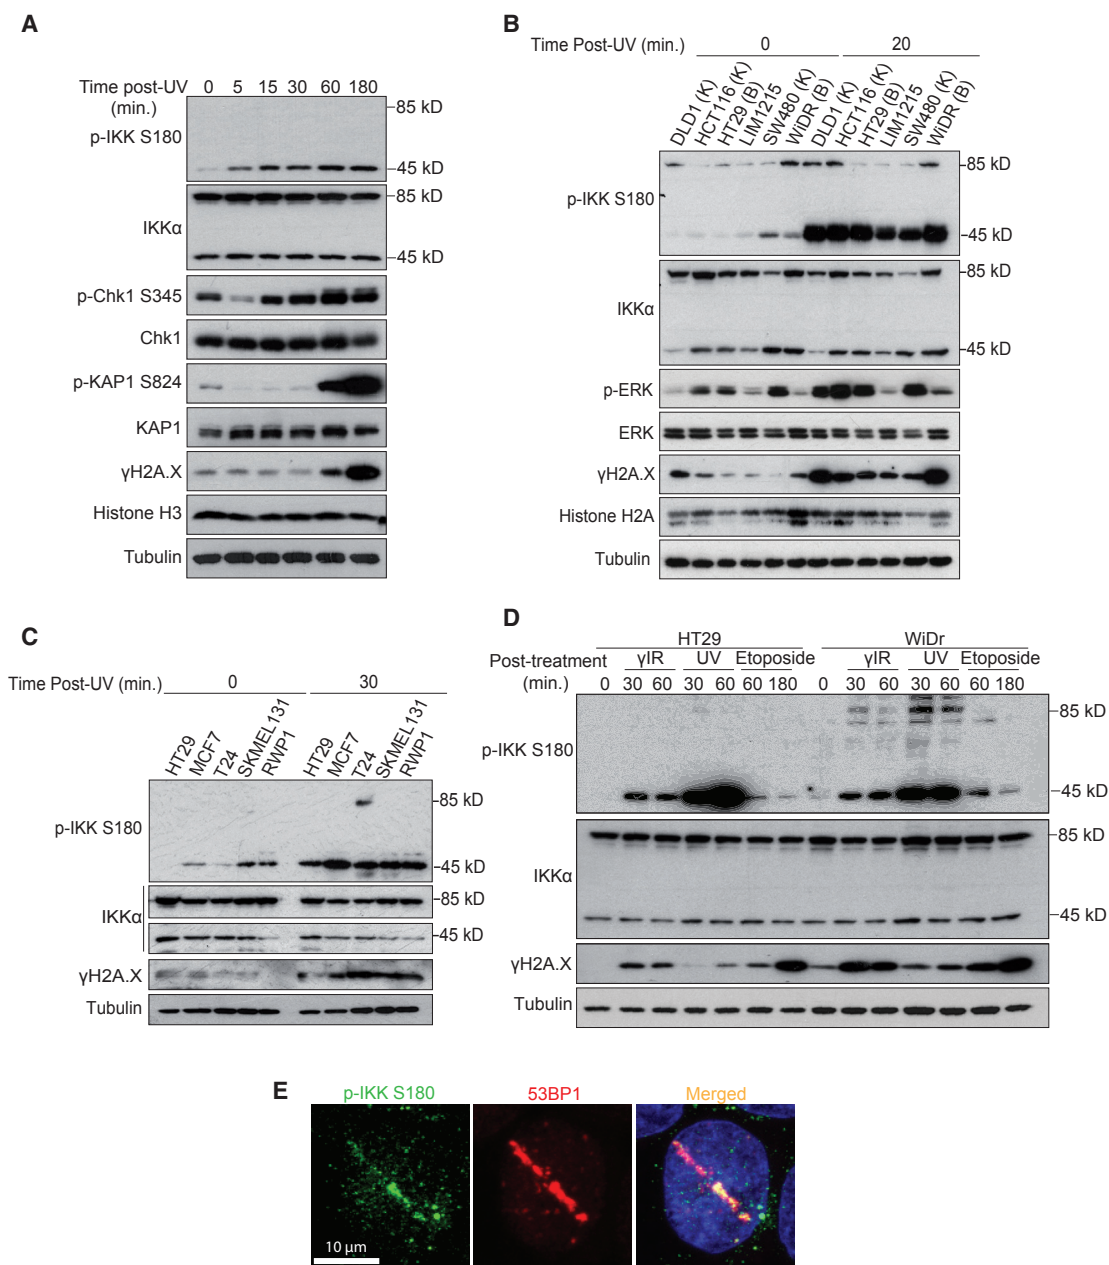

**Figure 1. Nuclear IKK $\alpha$  Is Activated by Different DNA-Damaging Agents**

(A) Western blot (WB) analysis of HT29 exposed to UV light (130 mJ) and collected at the indicated time points.

(B) WB analysis of various CRC cells left untreated or collected 20 min after UV (130 mJ) exposure. K and B indicate the presence of mutations in KRAS (K) or BRAF (B) in the different cell lines.

(C) WB analysis of different colorectal (HT29), breast (MCF7), bladder (T24), melanoma (SKMEL 131), and pancreatic (RWP1) cancer cell lines collected 30 min after UV exposure (130 mJ).

(D) WB analysis of HT29 and WiDr cells treated with the indicated DNA-damaging agents and collected at different time points.

(E) Immunofluorescence analysis of HT29 cells to determine the co-localization of 53BP1 and p-IKK in laser-induced stripes.

See also [Figure S1](#) and [Table S1](#).

Of these kinases, only p38-MAPK and IKK $\alpha$ (p45) were observed to be significantly induced in response to UV treatment ([Figure 2B](#)). Nevertheless, TAK1 and BRAF inhibitors prevented the activation of p38-MAPK in response to UV, indicating that the basal activity of

TAK1 and BRAF are required to prime p38-MAPK for subsequent damage-induced activation ([Figure 2B](#)).

To add further support to these findings and to exclude potential off-target effects of the p38-MAPK inhibitors, we examined

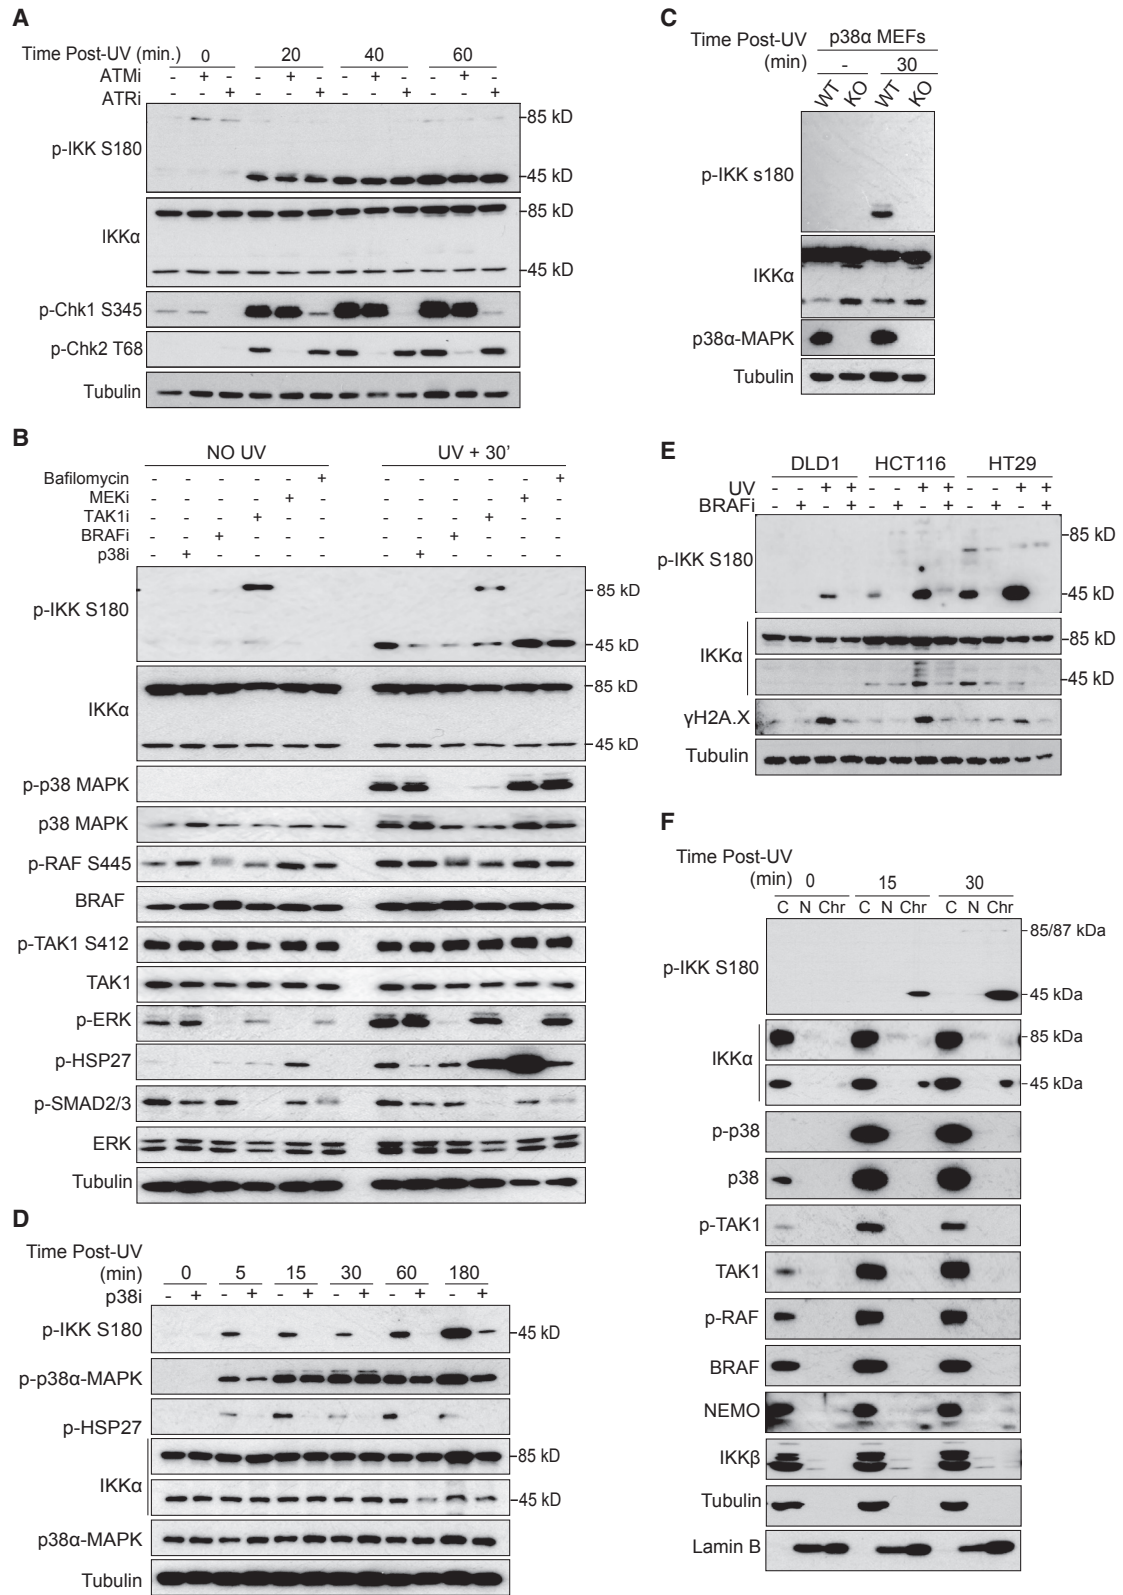

(legend on next page)

IKK $\alpha$ (p45) phosphorylation in UV-treated p38 $\alpha$ -MAPK knockout cells (Adams et al., 2000). In agreement with our inhibitor experiments, p38 $\alpha$ -MAPK knockout cells failed to induce IKK $\alpha$ (p45) phosphorylation in response to UV (Figure 2C). p38 $\alpha$ -MAPK inhibition also prevented IKK $\alpha$ (p45) Ser180 phosphorylation at multiple time points following UV treatment (Figure 2D). Moreover, BRAF inhibition was found to abrogate p-IKK $\alpha$ (p45) induction independent of BRAF mutational status (Figure 2E), irrespective of DNA-damaging stimulus (Figure S2B), and at a range of different time points (Figure S2C). Comparable effects on p-IKK $\alpha$ (p45) induction were also observed using two different BRAF inhibitors, vemurafenib and sorafenib (Figures S2D and S2E), which are used in clinical practice. These results establish that IKK $\alpha$ (p45) is rapidly activated in response to DNA-damaging agents downstream of TAK1, BRAF, and p38-MAPK. Notably, we did not detect evidence of nuclear TAK1, BRAF, or p38-MAPK following UV treatment (Figure 2F), suggesting that IKK $\alpha$  is principally activated in the cytoplasm, translocates to the nucleus, and accumulates on chromatin.

### IKK $\alpha$ and BRAF Facilitate ATM Activation and Downstream DDR Signaling

In light of our findings that IKK $\alpha$ (p45) is rapidly induced by DNA damage, we consider the possibility that p-IKK $\alpha$ (p45) may contribute to the DDR. To investigate this possibility further, we conducted a phospho-proteomic analysis of control and IKK $\alpha$ -knockdown HT29 cells either untreated, as before, or subject to UV irradiation for 30 min. We observed that the UV-induced phosphorylation of several DDR components, including 53BP1, MDC1, and KAP1, were compromised in cells lacking IKK $\alpha$  (Figure 3A; Table S2). Western blot analysis of IKK $\alpha$ -knockdown cells exposed to UV at different time points further confirmed that Chk1 phosphorylation on Ser345 and  $\gamma$ H2A.X induction is significantly attenuated in IKK $\alpha$ -depleted cells (Figure S3A). In contrast, knocking down IKK $\beta$  or NEMO had no measurable effect on Chk1, Ser345, and histone H2A.X phosphorylation upon UV treatment (Figure S3B).

Since H2A.X, MDC1, 53BP1, and KAP1 are known substrates of ATM, we considered the possibility that IKK $\alpha$ (p45) may facilitate ATM activation after UV exposure. Auto-phosphorylation of ATM at Ser1981, which is an established marker of ATM activation, was significantly reduced in IKK $\alpha$  knockout cells exposed to UV (Figure 3B). IKK $\alpha$  knockout cells were also compromised for ATM activation following IR (Figure S3C) or doxorubicin treatment (Figure S3D) and at multiple time points tested. Impaired ATM activation in IKK $\alpha$  knockout cells was also associated with attenuated p-Chk2 (T68), p-KAP1 (S824), and  $\gamma$ H2A.X levels. Impaired ATM activation following UV exposure was

rescued by lentiviral transduction of mCherry-IKK $\alpha$  in the IKK $\alpha$ -deficient cells (Figure 3C).

Since BRAF is required for IKK $\alpha$ (p45) activation following DNA damage, we assessed the impact of BRAF inhibitors on ATM activation. In agreement with our previous data, inhibition of BRAF significantly reduced ATM activation, as measured by the induction of ATM Ser1981 auto-phosphorylation, and also compromised downstream phosphorylation of DDR markers in UV- (Figure 3D) and IR-treated (Figure S3E) HT29 cells. Similar results were also observed in breast, pancreatic, and melanoma cancer cell lines (Figure S3F).

Since the MRE11, RAD50, and NBS1 (MRN) complex is responsible for the recruitment of ATM to sites of DNA damage, we investigated whether IKK $\alpha$  deficiency or BRAF inhibition may affect MRN complex stability. Western blot analysis revealed that the protein levels of the MRN complex were unaffected both in IKK $\alpha$ -deficient cells (Figure S3G) and after BRAF inhibition (Figure S3H). We also investigated the impact of IKK $\alpha$  knockdown in *Rad50*<sup>sl/sl</sup> mutant cells, which exhibit a hypermorphic signaling phenotype that suppresses ATM deficiency by activating other phosphatidylinositol 3-kinase (PI3K)-like kinases (Morales et al., 2005). In contrast to wild-type cells, knocking down IKK $\alpha$  in *Rad50*<sup>sl/sl</sup> mutant cells did not prevent KAP1 and CHK1 phosphorylation after UV exposure, but instead resulted in the robust activation of these DDR markers (Figure S3I). These data suggest that similar to ATM deficiency, the *Rad50*<sup>sl/sl</sup> allele is capable of suppressing the signaling defects caused by IKK $\alpha$  knockdown, potentially through the activation of other PI3K-like kinases.

### IKK $\alpha$ Interacts with and Directly Phosphorylates ATM in Response to DNA Damage

Next, we examined whether IKK $\alpha$  and ATM interact upon DNA damage. Immunoprecipitation experiments with an anti-IKK $\alpha$ (p45) antibody detected an interaction between endogenous ATM and both full-length and IKK $\alpha$ (p45), 15 min after UV treatment (Figure 3E). This observation raised the possibility that IKK $\alpha$ (p45) may directly phosphorylate ATM in response to DNA damage, potentially contributing to ATM activation. Consistent with this possibility, kinase assays revealed that recombinant IKK $\alpha$  is able to phosphorylate a fragment of ATM comprising amino acids 1,911–2,063 *in vitro* (Figure 3F). The same fragment was also phosphorylated in lysates from IKK $\alpha$  wild-type (WT) but not from IKK $\alpha$ -deficient cells (Figure 3G). Mass spectrometry analysis of the *in vitro* phosphorylated ATM fragment showed that S1974, S1987, S2058, and T2059 are direct substrates of the IKK $\alpha$  kinase (Figure 3H). It should be noted that once activated, ATM auto-phosphorylates itself on Ser367, Ser1893,

#### Figure 2. Activation of IKK $\alpha$ by DNA Damage Is Dependent on BRAF and p38 $\alpha$ -MAPK Activity

- (A) WB analysis of HT29 pretreated with ATM or ATR inhibitors and then exposed to UV (130 mJ).  
 (B) WB analysis of HT29 cells treated with the indicated inhibitors (p38i = SB203580, 10  $\mu$ M; BRAFi = AZ628, 10  $\mu$ M; TAKI = 5Z-7-oxozeanol, 10  $\mu$ M; MEKi = trametinib, 10  $\mu$ M; bafilomycin, 10 nM) 16 h before UV exposure (130 mJ) and collected 30 min after treatment.  
 (C) WB analysis of p38 $\alpha$  wild-type (WT) and knockout (KO) MEFs collected 30 min after UV exposure (130 mJ).  
 (D) WB analysis of WT MEFs treated with p38i for 16 h and then exposed to UV, as indicated.  
 (E) WB of different CRC cell lines treated with the BRAF inhibitor AZ628 (16 h, 10  $\mu$ M) before UV light (130 mJ) exposure and collected 30 min after treatment.  
 (F) WB of cytoplasmic (C), nuclear (N), and chromatin (Chr) extracts from HT29 cells collected at different time points after UV treatment.

See also Figure S2.

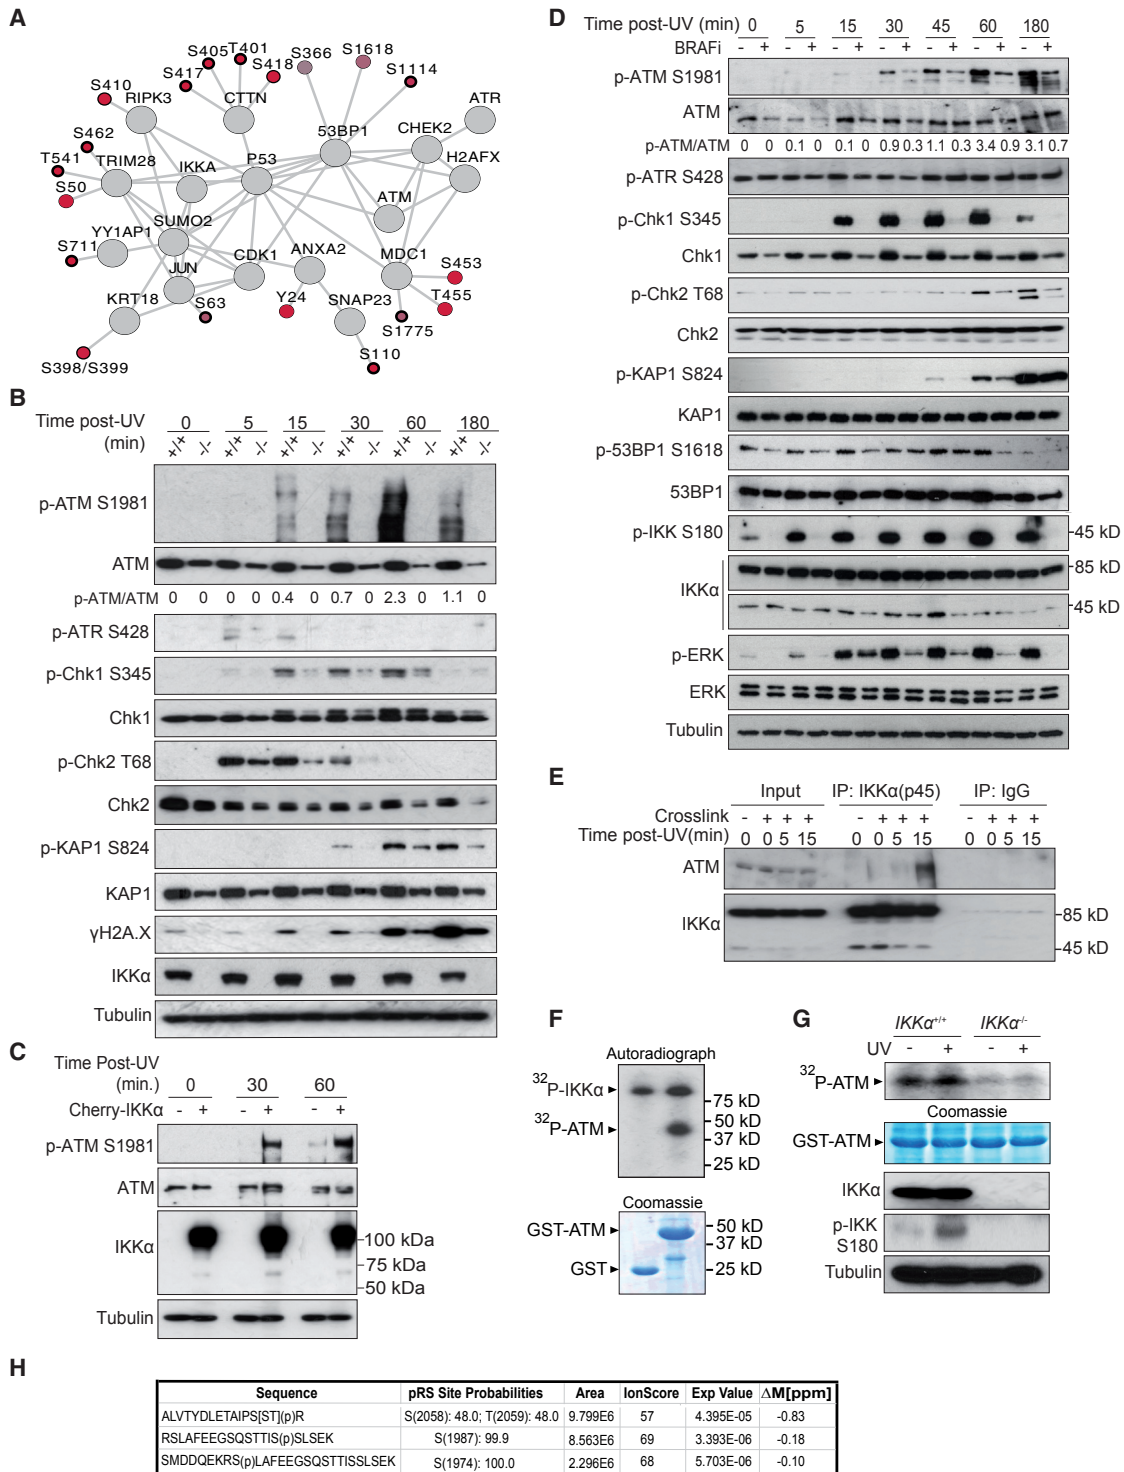

**Figure 3. IKKα Downstream of BRAF Is Required for the Phosphorylation of Specific DDR Elements after DNA Damage**

(A) Network of selected proteins related to DNA damage with phosphosites increasing upon UV irradiation in control ( $q < 0.15$ , positive  $\log_2$  [fold-change]) but not in IKKα-knockdown cells ( $\Delta \log_2$  [fold-change]  $> 0.5$ ). Color fills represent the differential fold-change upon UV treatment between control and IKKα-knockdown cells, and the width of the phosphosite borders represents the significance of the change in control cells upon UV irradiation (bold:  $q < 0.05$ , medium:  $0.05 < q < 0.1$ , light:  $0.1 < q < 0.15$ ).

(B) WB analysis of IKKα WT (+/+) and IKKα KO (-/-) cells treated with UV light (130 mJ).

(C) WB analysis of UV-treated IKKα KO cells (-) and the same cells transduced with Cherry-IKKα expression vector (+).

(legend continued on next page)

and Ser1981, with the latter commonly used as a marker of ATM activation *in vivo*. However, these auto-phosphorylation sites are dispensable for ATM activation following DNA damage based on the fact that knockin mice mutated for these three sites exhibit normal downstream DDR signaling (Daniel et al., 2008). Since the loss of IKK $\alpha$  impairs robust ATM activation, our data raise the possibility that IKK $\alpha$ (p45) phosphorylation of these distinct sites in ATM may facilitate its activation.

### IKK $\alpha$ and BRAF Contributes to DNA Damage Resolution

Since ATM activation is important for coordinating DNA repair, we next tested the possible impact of BRAF and IKK $\alpha$  inhibition in promoting lesion resolution. Inhibiting BRAF did not impair the formation of  $\gamma$ H2A.X/53BP1 foci at sites of IR-induced DNA damage, but instead imposed a significant delay in lesion resolution (Figure 4A), consistent with defective or attenuated DNA repair. Phosphorylation of 53BP1 by ATM is required to recruit Rap1 interacting factor 1 (RIF1) to sites of DNA damage to counteract DSB end resection to promote NHEJ in G1 (Chapman et al., 2012a). In agreement with our previous observations, co-recruitment of 53BP1 and its cofactor RIF1 was attenuated following BRAF inhibition (Figure 4B) or in IKK $\alpha$  knockout mouse embryonic fibroblasts (MEFs) (Figure 4C). IKK $\alpha$ -deficient cells or cells subject to BRAF inhibition also exhibited a significant increase in the levels of DNA breaks in UV-treated MEFs as determined by comet assay (Figures 4D and S4A). These results suggest that the loss or inhibition of IKK $\alpha$  or BRAF compromises ATM activation and hinders downstream DNA repair.

To further examine the contribution of IKK $\alpha$  and BRAF to 53BP1-dependent DNA repair, we used conditional *Trf2*<sup>FL/FL</sup> MEFs; inactivation of the shelterin subunit telomeric repeat-binding factor 2 (TRF2) leads to telomere deprotection and chromosome end-to-end fusions mediated by 53BP1-dependent NHEJ (Chapman et al., 2013; Celli and de Lange, 2005). Following TRF2 inactivation by adenoviral CRE transduction, MEFs were left untreated or treated with BRAF or MEK inhibitors (which do not prevent damage-induced IKK $\alpha$ (p45) phosphorylation; see Figure 2D) for 72 h and then the cells were processed for metaphase visualization. Using telomere-specific fluorescence *in situ* hybridization (FISH), cells were scored for the presence of chromosome end-to-end fusions. Consistent with our previous findings, IKK $\alpha$  knockdown (Figure 4E) or treatment with BRAF inhibitor (Figure 4F) significantly reduced chromosome fusions after *Trf2* deletion. In contrast, MEK inhibition did not affect chromosome fusions in *Trf2* null MEFs (Figure S4B), even though this had a comparable effect on cell-cycle position when compared to the BRAF inhibitor (Figure S4C) and IKK $\alpha$  knockdown (Figure S4D). Consistent with impaired ATM function, BRAF inhibition precluded RIF1 recruitment to the telomeres after *Trf2* deletion (Figure S4E). These results further suggest that

BRAF and IKK $\alpha$  affect 53BP1 and RIF1 function, thereby allowing the effective resolution of DNA damage by NHEJ in G1.

### BRAF and IKK $\alpha$ Inhibition Synergize with DNA Damage-Based Therapy in Patient-Derived Tumoroids

Current protocols for cancer treatment rely to a large extent on DNA-damaging agents that selectively kill highly proliferative tumor cells but impose a lesser effect on low proliferating cancer cells. Furthermore, PI3K-like kinase inhibitors, including antagonists of ATM, ATR, and DNA-PKcs, are in clinical development to exploit their impact on the DDR. In light of our findings that BRAF and IKK $\alpha$  are required for efficient ATM signaling and DNA repair, we hypothesized that the inhibition of these kinases may synergize with DNA-damaging drugs to promote tumor cell killing. To test this possibility, we treated patient-derived colorectal cancer (CRC) tumoroids (Figure 5A), which have been recently validated as models for therapy prescription (Sato et al., 2011; Vlachogiannis et al., 2018), with suboptimal doses of 5-FU+irinotecan (Iri), alone or in combination with the BRAF inhibitors vemurafenib or AZ628. Consistent with our cellular studies, BRAF inhibition significantly reduced ATM activation and Chk1 phosphorylation in response to damage (Figure 5B), with the combination treatment imposing a striking synergistic effect on the eradication of tumoroids compared with single treatments alone (Figure 5C). Comparable synergistic effects with BRAF inhibitors were also observed when treating tumoroids with increasing doses of 5-FU+Iri (Figures 5D and 5E) or  $\gamma$ -irradiation (Figure S5A), or using the DNA-damaging agent doxorubicin (Figure S5B), which is commonly used in breast cancer treatment but is primarily ineffective against CRC tumors as a single agent.

The loss of CRC tumoroid viability in the combination treatments was also associated with the massive accumulation of DNA damage and induction of apoptosis as determined by  $\gamma$ H2A.X and cleaved caspase 3 levels, respectively (Figures 5F, 5G, S5C, and S5D). The enhanced accumulation of DNA breaks in tumoroids subject to the combination treatment was further confirmed by comet assays (Figures 5H and S5E). Most important, tumoroids subjected to the partial depletion of IKK $\alpha$  by CRISPR-Cas9 and treated with 5-FU+Iri displayed reduced ATM activation (Figure 5I) with no significant cell-cycle alterations (Figure S5F), and were not further sensitized by BRAF inhibitors (Figure 5J). IKK $\alpha$ -depleted tumoroids do not show any reduction in IKK $\beta$  levels or activity (Figures 5I and S5G). These data suggest that BRAF and IKK $\alpha$  inhibition could be exploited to improve tumor killing in combination with DNA-damaging chemotherapy or radiotherapy.

### BRAF Inhibition Synergizes with DNA Damage-Based Therapy in a Patient-Derived Xenograft Model *In Vivo*

To further explore the therapeutic potential of drug combinations involving BRAF inhibitors and DNA-damaging agents, we used

(D) WB analysis of HT29 pretreated with the BRAF inhibitor AZ638 (16 h, 10  $\mu$ M) and then exposed to UV and collected at the indicated time points.

(E) Immunoprecipitation assay with anti-IKK $\alpha$ (p45) antibody from HT29 cells treated as indicated.

(F and G) *In vitro* kinase assay using glutathione S-transferase (GST) or GST-ATM (amino acids [aa] 1,854–2,063) as substrate and recombinant active IKK $\alpha$  (F) or lysates from IKK $\alpha$  WT (+/+ ) and IKK $\alpha$  KO (–/–) cells untreated or treated with UV for 15 min (G).

(H) Mass spectrometry analysis of the GST-ATM peptide phosphorylated *in vitro* with recombinant IKK $\alpha$ .

See also Figure S3 and Table S2.



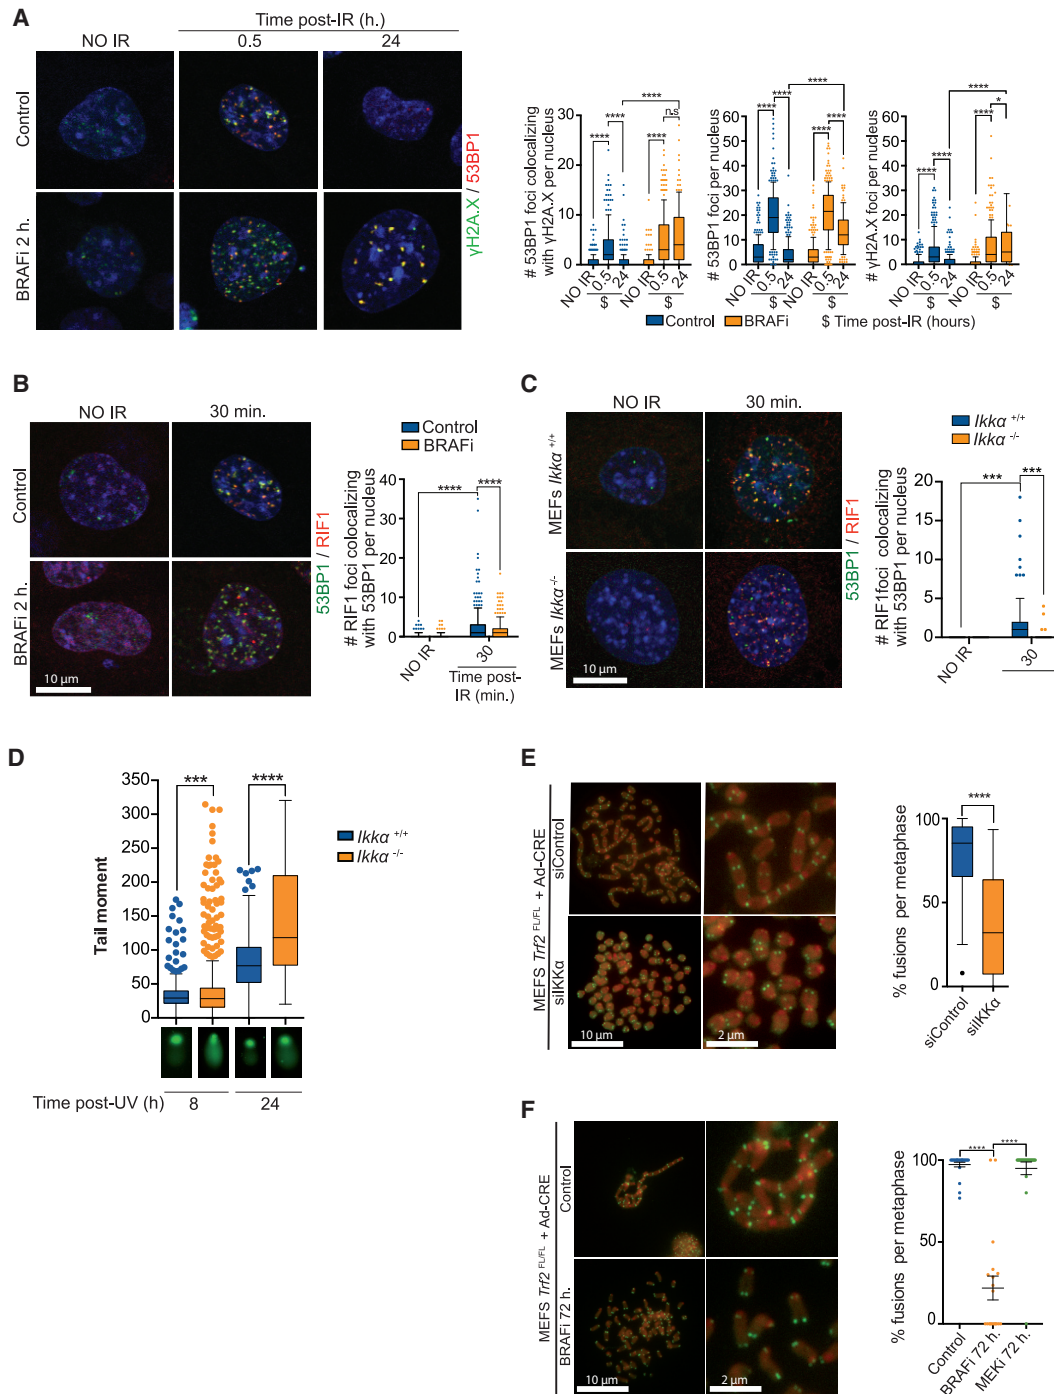

#### Figure 4. *IKK $\alpha$* Downstream of BRAF Functionally Contributes to DNA Damage Resolution

(A) Immunofluorescence analysis of 53BP1 and  $\gamma$ H2A.X in control or BRAF inhibitor-treated MEFs exposed to IR (2 Gy) and quantification from 3 independent experiments performed.

(B and C) Double immunofluorescence analysis of 53BP1 and RIF1 and quantification of the number of co-localizing foci per nucleus in BRAF-treated (2 h, 10  $\mu$ M) (B) and *IKK $\alpha$*  wild-type (+/+) or KO (-/-) MEFs (C).

(D) Comet assay of *IKK $\alpha$*  wild-type (+/+) or KO (-/-) MEFs 8 and 24 h after DNA damage exposure (UV, 130 mJ).

(E and F) Representative images of FISH analysis from control and BRAF-inhibited *Trf2*-deficient MEFs using a telomeric probe (green) (E) or *IKK $\alpha$*  knockdown (small interfering *IKK $\alpha$*  [si*IKK $\alpha$* ]) cells (F). Quantification of the relative number of metaphases containing fused chromosomes from three independent experiments performed is shown at right.

See also Figure S4.

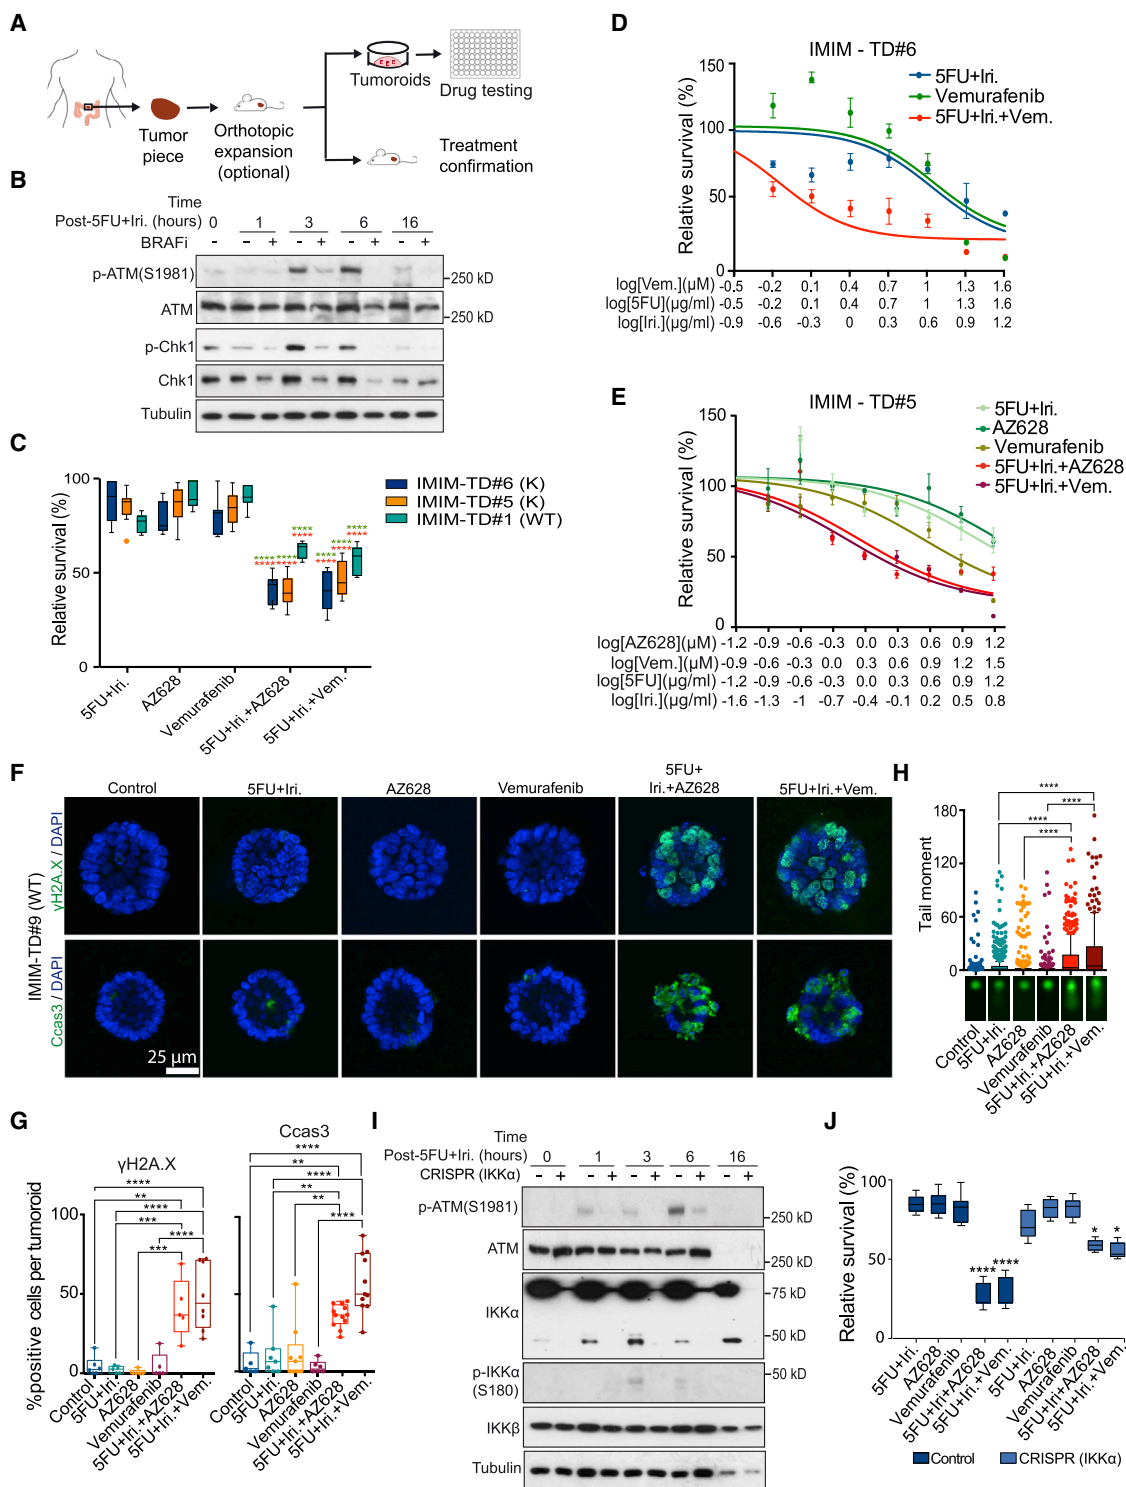

**Figure 5. BRAF Inhibition Enhances the Effect of DNA Damage-Based Therapy in CRC Patient-Derived Tumoroids**

(A) Experimental design used for the expansion of primary CRC tumors, generation of patient-derived tumoroids, and drug testing. (B) Western blot analysis of control and BRAF-inhibited IMIM-TD#5, collected at the indicated time points after IR treatment. (C) Quantification of tumoroid viability after treatment with the indicated compounds as a single treatment or in combination. (D and E) Dose-response curves of two different tumoroids, IMIM-TD#6 (D) and IMIM-TD#5 (E), treated as indicated.

(legend continued on next page)

two independent patient-derived metastatic tumors (IMIM-X#1 and IMIM-X#3) that possess acquired resistance to regimes of DNA damage-based and EGFR antibody-based therapies (Montagut et al., 2012). Equivalent volumes of tumor cells were implanted in the cecum of nude mice, and tumor growth was monitored by palpation. At the time of tumor detection, animals were randomly ascribed to the treatment groups: control, 5-FU+Iri, vemurafenib, or 5-FU+Iri plus vemurafenib. The combination of 5-FU+Iri plus vemurafenib significantly reduced tumor growth *in vivo* compared with single-agent treatments (Figures 6A and 6B), and this was associated with the presence of extensive areas of necrosis and fibrosis (Figure 6C). Morphologically, residual neoplastic cells displayed a severe pleomorphism after combination treatment, but not with other conditions tested (Figure 6C), and was associated with the accumulation of DNA damage in the epithelial tumor component (Figures 6D and 6E). Notably, the combination treatment did not lead to measurable toxicity, as indicated by the overall aspect of the animals and the absence of anomalous cleaved caspase 3 staining in the colonic tissue adjacent to the implanted tumors (Figure S6A). The combination treatment may also affect the invasive nature of these tumors, as we detected only 1 animal with peritoneal implants from 5 animals in this group compared with the controls (5/5 animals with implants) and the single treated animals (5/6 and 3/6 for vemurafenib and 5-FU+Iri, respectively) (Figure S6B).

Finally, we examined the long-term therapeutic potential of the vemurafenib and 5-FU+Iri combination treatment of IMIM-X#1 tumors *in vivo*. After a 3-month follow-up, we observed a significant impact on the survival of animals treated with 5-FU+Iri in combination with vemurafenib when compared with vehicle-treated, vemurafenib-only, and 5-FU+Iri-treated animals. All of the mice treated with 5-FU+Iri or vemurafenib only died during the course of the experiment due to IMIM-X#1-derived tumor growth. In contrast, six of seven animals treated with 5-FU+Iri plus vemurafenib survived for the duration of the study and were tumor-free at the end of the experiment. There was no evidence of tumor growth in the only mouse that succumbed in this treatment group, which appeared to have died from other causes. The resulting Kaplan-Meier curves (Figures 6F and 6G) demonstrate the potent effect of combining BRAF inhibitors with DNA-damaging agents in promoting tumor eradication and long-term survival *in vivo*.

## DISCUSSION

IKK $\alpha$  was previously found to influence tumor initiation and cancer progression through NF- $\kappa$ B-dependent and-independent

mechanisms. However, insights into the substrates of IKK $\alpha$  and the pathways that IKK $\alpha$  regulates were unknown. Using an unbiased proteomic analysis to identify IKK $\alpha$  substrates, we have uncovered an unappreciated role for IKK $\alpha$  and its activating kinase BRAF in the DDR pathway. Loss or inhibition of these kinases compromised ATM activation and downstream DDR signaling, impaired DNA repair by 53BP1-dependent end joining, and synergized with commonly used chemotherapies to induce tumor eradication *in vivo*. Since these tumors are refractory to killing by single-agent treatments, our proposed combination strategy may have important implications for cancer treatment.

A role for IKK $\alpha$  in the DDR is supported by our findings that IKK $\alpha$  is rapidly activated by phosphorylation on Ser180 in response to a range of DNA-damaging agents and proceeds to accumulate on chromatin at sites of DNA damage. Damage-induced IKK $\alpha$  activation was found to occur independently of the canonical damage-responsive kinases ATM and ATR, but is instead dependent on BRAF, TAK1, and p38-MAPK kinases. We also showed that IKK $\alpha$  interacts with ATM shortly after the introduction of DNA damage, which raised the possibility that IKK $\alpha$  may directly regulate ATM function. Recombinant IKK $\alpha$  was found to directly phosphorylate ATM on four sites distinct from the known ATM auto-phosphorylation sites, including the commonly used activation marker pSer1981. IKK $\alpha$ -deficient cell extracts were also compromised for ATM phosphorylation *in vitro*, and the loss of IKK $\alpha$  or the inhibition of BRAF was found to attenuate ATM activation both in cells and in tumoroids. In agreement with the observed impairment in ATM activation, IKK $\alpha$ -deficient cells or inhibition of BRAF also resulted in the diminished phosphorylation of Chk1, Chk2,  $\gamma$ H2A.X, MDC1, 53BP1, and Kap1 following the induction of DNA damage. We propose that IKK $\alpha$  affects the DDR by facilitating ATM activation. Since ATM auto-phosphorylation sites are dispensable for its activation (Daniel et al., 2008), future studies should assess the importance of the ATM residues phosphorylated by IKK $\alpha$ .

DDR signaling also plays an important role in coordinating the repair of DNA lesions. The loss or inhibition of IKK $\alpha$  or BRAF was found to delay the resolution of DNA damage, which manifests as the persistence of H2A.X and 53BP1 foci at late time points following the induction of damage. The inhibition of BRAF or loss of IKK $\alpha$  also resulted in persistent tail moments after damage in comet assays. Attenuated damage signaling in these cells is the likely cause of the DNA repair defects, as IKK $\alpha$ -deficient cells exhibit impaired recruitment of RIF1 to the sites of DNA damage, which is dependent on the phosphorylation of 53BP1 by ATM (Chapman et al., 2013). A role for BRAF and IKK $\alpha$  in

(F and G) Representative images of  $\gamma$ H2A.X and cleaved caspase 3 staining in a representative tumoroid treated as indicated (F) and quantification of the percentage of positive cells from 20 tumoroids per condition counted (G).

(H) Comet assay of IMIM-TD#9, treated as indicated.

(I and J) Western blot analysis of control and IKK $\alpha$ -depleted IMIM-TD#9 using CRISPR-Cas9 technology (I) and quantification of cell viability after 72 h of culture with the indicated treatments (J).

The statistical analysis in (C) and (I) was performed by unpaired t test, comparing the combination treatments with single 5FU+irinotecan (red) or BRAF/IKK inhibitors (green); \*\*\*\*p < 0.0001, n.s., non-significant. For the statistical analysis in (G), we used two-way ANOVA, and the p values are indicated as \*\*p < 0.01 and \*\*\*\*p < 0.0001. Vem, vemurafenib; 5FU, 5-fluorouracil; Dox, doxorubicin; and Iri, irinotecan.

See also Figure S5.

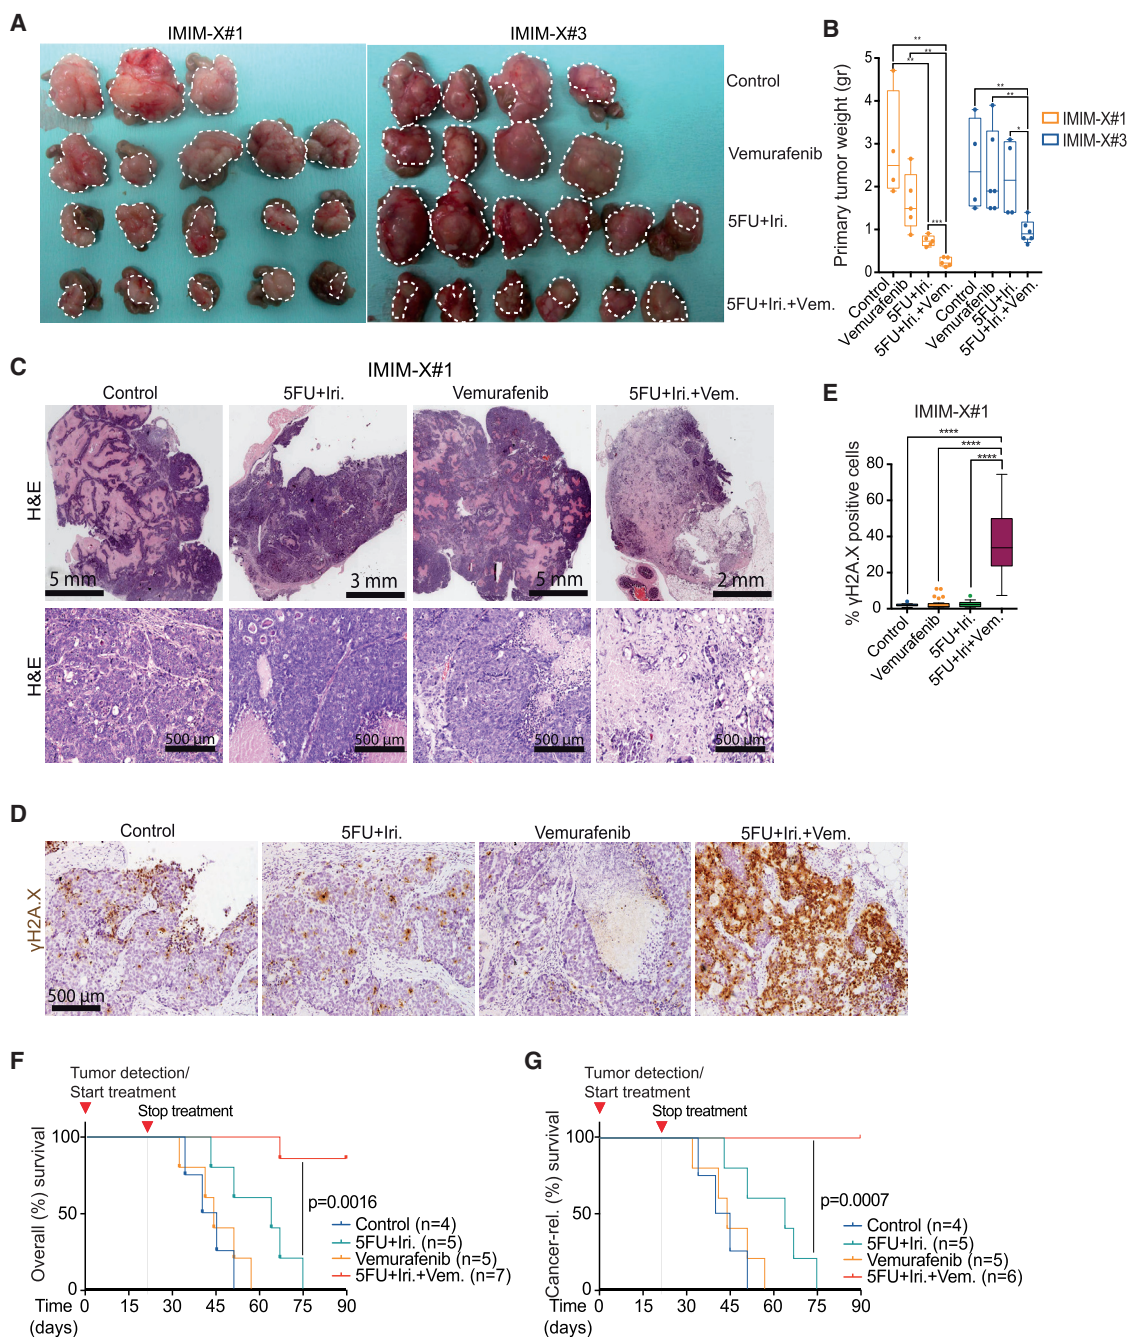

See also Figure S6.

promoting efficient ATM activation and 53BP1-dependent end joining was further supported by experiments in conditional *Trf2* knockout MEFs. Conditional inactivation of the Shelterin subunit TRF2 results in telomere deprotection, which normally leads to “spaghetti chromosomes,” formed as a consequence of the fusion of dysfunctional telomeres by 53BP1-dependent end joining (Chapman et al., 2013). We found that treating *Trf2*-deficient MEFs with BRAF inhibitors (but not MEK<sub>i</sub>) or depletion of IKK $\alpha$  reduced telomere-telomere fusions. We attribute this effect to the reduction in the co-recruitment of 53BP1 and RIF1 at dysfunctional telomeres. These results highlight the importance of BRAF and IKK $\alpha$  signaling for efficient ATM signaling and subsequent repair following DNA damage.

Finally, we present evidence that clinically approved BRAF inhibitors could be repurposed for use in combination with DNA-damaging chemotherapies to target relevant cancers. This conclusion is based on our findings that the BRAF inhibitors vemurafenib or AZ628, when combined with 5-FU+Iri, effectively eradicate two different metastatic tumors that had acquired therapeutic resistance in human patients, although we cannot directly ascribe these results to the effect of BRAF inhibition on IKK $\alpha$ . Until now, the clinical use of BRAF inhibitors has focused on BRAF mutant (primarily BRAFV600E) tumors. Our findings demonstrating that BRAF inhibition synergizes with DNA-damaging drugs independent of BRAF mutation status therefore expands the potential target population that would benefit from this therapeutic approach. In addition, we have shown that compounds that are primarily ineffective in CRC but are used in other types of cancer (e.g., doxorubicin) should be reconsidered in combination treatments with BRAF inhibitors. Our results will prompt further preclinical and clinical studies to understand the broader utility of BRAF inhibitors beyond their current applications.

## STAR★METHODS

Detailed methods are provided in the online version of this paper and include the following:

- KEY RESOURCES TABLE
- LEAD CONTACT AND MATERIALS AVAILABILITY
- EXPERIMENTAL MODEL AND SUBJECT DETAILS
  - Animal Studies
  - Patient-derived tumoroids
  - Cell lines
- METHOD DETAILS
  - Tumoroid viability assays
  - Cell lysis and Western Blot (WB)
  - Cell fractionation
  - immunoprecipitation Assay
  - Immunohistochemical Staining (IHC)
  - Immunofluorescence (IF) analysis
  - Peptide Nucleic Acid (PNA) Fluorescence *In Situ* Hybridization (FISH) and IF-FISH
  - Laser microirradiation induced DNA damage
  - Knock down and knock out assays
  - Cell cycle analysis
  - Comet Assay

- Kinase Assay
- Mass Spectrometry Analysis
- QUANTIFICATION AND STATISTICAL ANALYSIS
- DATA AND CODE AVAILABILITY

## SUPPLEMENTAL INFORMATION

Supplemental Information can be found online at <https://doi.org/10.1016/j.molcel.2019.05.036>.

## ACKNOWLEDGMENTS

We want to thank the Bigas and Boulton lab members for constructive discussions and suggestions and Kitty van Zwieten, Grazia Giuffrida, and Marta Garrido for technical support. This work was funded by grants from Instituto de Salud Carlos III FEDER (PIE15/00008 and PI16/00437), Generalitat de Catalunya 2017SGR135, and the “Xarxa de Bancs de Tumors” sponsored by Pla Director d’Oncologia de Catalunya (XBTC). C.C. is supported by FPI BES-2014-068451 and the EMBO Short-Term Fellowship (n<sup>o</sup>7084). P.M. is supported by funding from the European Union’s Horizon 2020 research and innovation program under the Marie Skłodowska-Curie grant agreement #702430. The Boulton lab is supported by The Francis Crick Institute, which receives its core funding from Cancer Research UK (FC0010048), the UK Medical Research Council (FC0010048), and the Wellcome Trust (FC0010048). S.J.B. is funded by European Research Council (ERC) Advanced Investigator Grants (TelMetab) and a Wellcome Trust Senior Investigator Grant. The Centre de Regulació Genòmica/Universitat Pompeu Fabra Proteomics Unit is part of the “Plataforma de Recursos Biomoleculares y Bioinformáticos (ProteoRed)” supported by grant PT13/0001 of Instituto de Salud Carlos III from the Spanish government and “Secretaria d’Universitats i Recerca del Departament d’Economia i Coneixement de la Generalitat de Catalunya” (2014SGR678). We acknowledge support from the Spanish Ministry of Economy and Competitiveness and “Centro de Excelencia Severo Ochoa 2013-2017” (SEV-2012-0208).

## AUTHOR CONTRIBUTIONS

A.B., S.J.B., and L.E. conceptualized the study, designed the experiments, and wrote the manuscript. E.B. and E.S. designed the proteomic analysis and evaluated the results. C.C., P.M., A. Villanueva, A. Vert, I.P., J.B., and M.M.-I. performed the biochemical assays and the *in vitro* and *in vivo* drug testing experiments. C.C. prepared the figures. M.G.-F. and M.I. performed the clinicopathological characterization of human tumors. C.M. provided clinical advice.

## DECLARATION OF INTERESTS

The authors declare no competing interests.

Received: April 25, 2018

Revised: March 13, 2019

Accepted: May 30, 2019

Published: July 10, 2019

## REFERENCES

- Adams, R.H., Porras, A., Alonso, G., Jones, M., Vintersten, K., Panelli, S., Valladares, A., Perez, L., Klein, R., and Nebreda, A.R. (2000). Essential role of p38 $\alpha$  MAP kinase in placental but not embryonic cardiovascular development. *Mol. Cell* 6, 109–116.
- Aiao, J.P., and Sunnerhagen, P. (2008). Rad3 and Sty1 function in *Schizosaccharomyces pombe*: an integrated response to DNA damage and environmental stress? *Mol. Microbiol.* 68, 246–254.
- Amado, R.G., Wolf, M., Peeters, M., Van Cutsem, E., Siena, S., Freeman, D.J., Juan, T., Sikorski, R., Suggs, S., Radinsky, R., et al. (2008). Wild-type KRAS is

- required for panitumumab efficacy in patients with metastatic colorectal cancer. *J. Clin. Oncol.* **26**, 1626–1634.
- Battle, E., and Clevers, H. (2017). Cancer stem cells revisited. *Nat. Med.* **23**, 1124–1134.
- Bothmer, A., Robbiani, D.F., Feldhahn, N., Gazumyan, A., Nussenzweig, A., and Nussenzweig, M.C. (2010). 53BP1 regulates DNA resection and the choice between classical and alternative end joining during class switch recombination. *J. Exp. Med.* **207**, 855–865.
- Bothmer, A., Robbiani, D.F., Di Virgilio, M., Bunting, S.F., Klein, I.A., Feldhahn, N., Barlow, J., Chen, H.T., Bosque, D., Callen, E., et al. (2011). Regulation of DNA end joining, resection, and immunoglobulin class switch recombination by 53BP1. *Mol. Cell* **42**, 319–329.
- Brenner, H., Kloor, M., and Pox, C.P. (2014). Colorectal cancer. *Lancet* **383**, 1490–1502.
- Bulavin, D.V., Higashimoto, Y., Popoff, I.J., Gaarde, W.A., Basur, V., Potapova, O., Appella, E., and Fornace, A.J., Jr. (2001). Initiation of a G2/M checkpoint after ultraviolet radiation requires p38 kinase. *Nature* **411**, 102–107.
- Canovas, B., Igea, A., Sartori, A.A., Gomis, R.R., Paull, T.T., Isoda, M., Perez-Montoyo, H., Serra, V., Gonzalez-Suarez, E., Stracker, T.H., and Nebreda, A.R. (2018). Targeting p38alpha Increases DNA Damage, Chromosome Instability, and the Anti-tumoral Response to Taxanes in Breast Cancer Cells. *Cancer Cell* **33**, 1094–1110.e8.
- Celli, G.B., and de Lange, T. (2005). DNA processing is not required for ATM-mediated telomere damage response after TRF2 deletion. *Nat. Cell Biol.* **7**, 712–718.
- Chapman, J.R., Sossick, A.J., Boulton, S.J., and Jackson, S.P. (2012a). BRCA1-associated exclusion of 53BP1 from DNA damage sites underlies temporal control of DNA repair. *J. Cell Sci.* **125**, 3529–3534.
- Chapman, J.R., Taylor, M.R., and Boulton, S.J. (2012b). Playing the end game: DNA double-strand break repair pathway choice. *Mol. Cell* **47**, 497–510.
- Chapman, J.R., Barral, P., Vannier, J.B., Borel, V., Steger, M., Tomas-Loba, A., Sartori, A.A., Adams, I.R., Batista, F.D., and Boulton, S.J. (2013). RIF1 is essential for 53BP1-dependent nonhomologous end joining and suppression of DNA double-strand break resection. *Mol. Cell* **49**, 858–871.
- Chen, I.T., Hsu, P.H., Hsu, W.C., Chen, N.J., and Tseng, P.H. (2015). Polyubiquitination of Transforming Growth Factor  $\beta$ -activated Kinase 1 (TAK1) at Lysine 562 Residue Regulates TLR4-mediated JNK and p38 MAPK Activation. *Sci. Rep.* **5**, 12300.
- Colomer, C., Margalef, P., Gonzalez, J., Vert, A., Bigas, A., and Espinosa, L. (2018). IKK $\alpha$  is required in the intestinal epithelial cells for tumour stemness. *Br. J. Cancer* **118**, 839–846.
- Daniel, J.A., Pellegrini, M., Lee, J.H., Paull, T.T., Feigenbaum, L., and Nussenzweig, A. (2008). Multiple autophosphorylation sites are dispensable for murine ATM activation in vivo. *J. Cell Biol.* **183**, 777–783.
- Di Nicolantonio, F., Martini, M., Molinari, F., Sartore-Bianchi, A., Arena, S., Saletti, P., De Dosso, S., Mazzucchelli, L., Frattini, M., Siena, S., and Bardelli, A. (2008). Wild-type BRAF is required for response to panitumumab or cetuximab in metastatic colorectal cancer. *J. Clin. Oncol.* **26**, 5705–5712.
- Escribano-Díaz, C., Orthwein, A., Fradet-Turcotte, A., Xing, M., Young, J.T., Tkáč, J., Cook, M.A., Rosebrock, A.P., Munro, M., Canny, M.D., et al. (2013). A cell cycle-dependent regulatory circuit composed of 53BP1-RIF1 and BRCA1-CtIP controls DNA repair pathway choice. *Mol. Cell* **49**, 872–883.
- Espinosa, L., Inglés-Esteve, J., Aguilera, C., and Bigas, A. (2003). Phosphorylation by glycogen synthase kinase-3 beta down-regulates Notch activity, a link for Notch and Wnt pathways. *J. Biol. Chem.* **278**, 32227–32235.
- Hindí, S.M., Sato, S., Xiong, G., Bohnert, K.R., Gibb, A.A., Gallot, Y.S., McMillan, J.D., Hill, B.G., Uchida, S., and Kumar, A. (2018). TAK1 regulates skeletal muscle mass and mitochondrial function. *JCI Insight* **3**, 98441.
- Hong, D.S., Morris, V.K., El Osta, B., Sorokin, A.V., Janku, F., Fu, S., Overman, M.J., Piha-Paul, S., Subbiah, V., Kee, B., et al. (2016). Phase IB Study of Vemurafenib in Combination with Irinotecan and Cetuximab in Patients with Metastatic Colorectal Cancer with BRAFV600E Mutation. *Cancer Discov.* **6**, 1352–1365.
- Hu-Lieskovan, S., Mok, S., Homet Moreno, B., Tsoi, J., Robert, L., Goedert, L., Pinheiro, E.M., Koya, R.C., Graeber, T.G., Comin-Anduix, B., and Ribas, A. (2015). Improved antitumor activity of immunotherapy with BRAF and MEK inhibitors in BRAF(V600E) melanoma. *Sci. Transl. Med.* **7**, 279ra41.
- Luo, J.L., Tan, W., Ricono, J.M., Korchynskyi, O., Zhang, M., Gonias, S.L., Cheresch, D.A., and Karin, M. (2007). Nuclear cytokine-activated IKK $\alpha$  controls prostate cancer metastasis by repressing Masp1. *Nature* **446**, 690–694.
- Margalef, P., Fernández-Majada, V., Villanueva, A., Garcia-Carbonell, R., Iglesias, M., López, L., Martínez-Iniesta, M., Villà-Freixa, J., Mulero, M.C., Andreu, M., et al. (2012). A truncated form of IKK $\alpha$  is responsible for specific nuclear IKK activity in colorectal cancer. *Cell Rep.* **2**, 840–854.
- Margalef, P., Colomer, C., Villanueva, A., Montagut, C., Iglesias, M., Bellosillo, B., Salazar, R., Martínez-Iniesta, M., Bigas, A., and Espinosa, L. (2015). BRAF-induced tumorigenesis is IKK $\alpha$ -dependent but NF- $\kappa$ B-independent. *Sci. Signal.* **8**, ra38.
- Montagut, C., Dalmases, A., Bellosillo, B., Crespo, M., Pairet, S., Iglesias, M., Salido, M., Gallen, M., Marsters, S., Tsai, S.P., et al. (2012). Identification of a mutation in the extracellular domain of the Epidermal Growth Factor Receptor conferring cetuximab resistance in colorectal cancer. *Nat. Med.* **18**, 221–223.
- Morales, M., Theunissen, J.W., Kim, C.F., Kitagawa, R., Kastan, M.B., and Petrini, J.H. (2005). The Rad50S allele promotes ATM-dependent DNA damage responses and suppresses ATM deficiency: implications for the Mre11 complex as a DNA damage sensor. *Genes Dev.* **19**, 3043–3054.
- Panier, S., and Boulton, S.J. (2014). Double-strand break repair: 53BP1 comes into focus. *Nat. Rev. Mol. Cell Biol.* **15**, 7–18.
- Preta, G., de Klark, R., Chakraborti, S., and Glas, R. (2010). MAP kinase signaling controls nuclear translocation of tripeptidyl-peptidase II in response to DNA damage and oxidative stress. *Biochem. Biophys. Res. Commun.* **399**, 324–330.
- Ribas, A., Gonzalez, R., Pavlick, A., Hamid, O., Gajewski, T.F., Daud, A., Flaherty, L., Logan, T., Chmielowski, B., Lewis, K., et al. (2014). Combination of vemurafenib and cobimetinib in patients with advanced BRAF(V600)-mutated melanoma: a phase 1b study. *Lancet Oncol.* **15**, 954–965.
- Richman, S.D., Seymour, M.T., Chambers, P., Elliott, F., Daly, C.L., Meade, A.M., Taylor, G., Barrett, J.H., and Quirke, P. (2009). KRAS and BRAF mutations in advanced colorectal cancer are associated with poor prognosis but do not preclude benefit from oxaliplatin or irinotecan: results from the MRC FOCUS trial. *J. Clin. Oncol.* **27**, 5931–5937.
- Rouse, J., Cohen, P., Trigon, S., Morange, M., Alonso-Llamazares, A., Zamanillo, D., Hunt, T., and Nebreda, A.R. (1994). A novel kinase cascade triggered by stress and heat shock that stimulates MAPKAP kinase-2 and phosphorylation of the small heat shock proteins. *Cell* **78**, 1027–1037.
- Sato, T., Stange, D.E., Ferrante, M., Vries, R.G., Van Es, J.H., Van den Brink, S., Van Houdt, W.J., Pronk, A., Van Gorp, J., Siersema, P.D., and Clevers, H. (2011). Long-term expansion of epithelial organoids from human colon, adenoma, adenocarcinoma, and Barrett's epithelium. *Gastroenterology* **141**, 1762–1772.
- Toll, A., Margalef, P., Masferrer, E., Ferrándiz-Pulido, C., Gimeno, J., Pujol, R.M., Bigas, A., and Espinosa, L. (2015). Active nuclear IKK correlates with metastatic risk in cutaneous squamous cell carcinoma. *Arch. Dermatol. Res.* **307**, 721–729.
- Vetter, I.R., and Wittinghofer, A. (2001). The guanine nucleotide-binding switch in three dimensions. *Science* **294**, 1299–1304.

- Vlachogiannis, G., Hedayat, S., Vatsiou, A., Jamin, Y., Fernández-Mateos, J., Khan, K., Lampis, A., Eason, K., Huntingford, I., Burke, R., et al. (2018). Patient-derived organoids model treatment response of metastatic gastrointestinal cancers. *Science* 359, 920–926.
- Vreka, M., Lilis, I., Papageorgopoulou, M., Giotopoulou, G.A., Lianou, M., Giopanou, I., Kanellakis, N.I., Spella, M., Agalioti, T., Armenis, V., et al. (2018).  $\text{I}\kappa\text{B}$  kinase  $\alpha$  is required for development and progression of *KRAS*-mutant lung adenocarcinoma. *Cancer Res.* 78, 2939–2951.
- Wu, Z.H., Shi, Y., Tibbetts, R.S., and Miyamoto, S. (2006). Molecular linkage between the kinase ATM and NF-kappaB signaling in response to genotoxic stimuli. *Science* 311, 1141–1146.
- Yang, Y., Xia, F., Hermance, N., Mabb, A., Simonson, S., Morrissey, S., Gandhi, P., Munson, M., Miyamoto, S., and Kelliher, M.A. (2011). A cytosolic ATM/NEMO/RIP1 complex recruits TAK1 to mediate the NF-kappaB and p38 mitogen-activated protein kinase (MAPK)/MAPK-activated protein 2 responses to DNA damage. *Mol. Cell. Biol.* 31, 2774–2786.
- Zhang, Q., Lenardo, M.J., and Baltimore, D. (2017). 30 Years of NF- $\kappa$ B: A Blossoming of Relevance to Human Pathobiology. *Cell* 168, 37–57.
- Zimmermann, M., Lottersberger, F., Buonomo, S.B., Sfeir, A., and de Lange, T. (2013). 53BP1 regulates DSB repair using Rif1 to control 5' end resection. *Science* 339, 700–704.

## STAR★METHODS

## KEY RESOURCES TABLE

| REAGENT or RESOURCE                                  | SOURCE                       | IDENTIFIER                   |
|------------------------------------------------------|------------------------------|------------------------------|
| <b>Antibodies</b>                                    |                              |                              |
| p-IKK s180                                           | Santa Cruz                   | sc-23470; RRID: AB_2122159   |
| IKK $\alpha$                                         | Merck Millipore              | OP133; RRID: AB_10681621     |
| IKK $\alpha$                                         | Abcam                        | ab32041; RRID: AB_733070     |
| IKK $\alpha$ (p45)                                   | Merck Millipore              | MABF222; RRID: not available |
| p-Chk1 S345                                          | Cell Signaling               | #2348; RRID: AB_331212       |
| Chk1                                                 | Cell Signaling               | #2360; RRID: AB_2080320      |
| p-KAP1 S824                                          | Bethyl Laboratories          | A300-767A; RRID: AB_669740   |
| KAP1                                                 | Cell Signaling               | #4123; RRID: AB_2256670      |
| $\gamma$ H2A.X                                       | Cell Signaling               | #2577; RRID: AB_2118010      |
| $\gamma$ H2A.X                                       | Merck Millipore              | 05-636; RRID: AB_309864      |
| p-ERK 1/2                                            | Cell Signaling               | #4370; RRID: AB_2315112      |
| ERK 1/2                                              | Cell Signaling               | #4696; RRID: AB_390780       |
| Histone H3                                           | Abcam                        | ab1791; RRID: AB_302613      |
| Lamin B                                              | Santa Cruz                   | sc-6216; RRID: AB_648156     |
| $\alpha$ -Tubulin                                    | Sigma                        | T6074; RRID: AB_477582       |
| IKK $\beta$                                          | Abcam                        | ab32135; RRID: AB_733071     |
| NEMO                                                 | Santa Cruz                   | sc-8330; RRID: AB_2124846    |
| Cleaved caspase 3                                    | Cell Signaling               | #9661; RRID: AB_2341188      |
| p-ATM S1981                                          | Merck Millipore              | 05-740; RRID: AB_309954      |
| p-53BP1 S1618                                        | Cell Signaling               | #6209; RRID: AB_11220229     |
| 53BP1                                                | Abcam                        | ab21083; RRID: AB_722496     |
| Anti-Rabbit-HRP (2ary)                               | DAKO                         | P0448; RRID: AB_2617138      |
| Anti-Mouse-HRP (2ary)                                | DAKO                         | P0260; RRID: AB_2636929      |
| Anti-Goat-HRP (2ary)                                 | DAKO                         | P0449; RRID: AB_2617143      |
| 53BP1                                                | Bethyl Laboratories          | A300-272A; RRID: AB_185520   |
| RIF1                                                 | Santa Cruz                   | sc-65191; RRID: AB_2126820   |
| Alexa Fluor 488 donkey anti-rabbit (2ary)            | Invitrogen                   | A21206; RRID: AB_141708      |
| Alexa Fluor 488 donkey anti-mouse (2ary)             | Invitrogen                   | A21202; RRID: AB_141607      |
| Alexa Fluor 546 donkey anti-rabbit (2ary)            | Invitrogen                   | A10040; RRID: AB_2534016     |
| Alexa Fluor 546 donkey anti-goat (2ary)              | Invitrogen                   | A11056; RRID: AB_142628      |
| ATM                                                  | Santa Cruz                   | sc-135663; RRID: AB_2062962  |
| <b>Biological Samples</b>                            |                              |                              |
| PDXIMIM#1-6                                          | Hospital del Mar (Barcelona) | N/A                          |
| <b>Chemicals, Peptides, and Recombinant Proteins</b> |                              |                              |
| DMEM                                                 | Sigma                        | N/A                          |
| Advanced DMEM/F12                                    | GIBCO                        | 12634028                     |
| AZ628 (BRAFi)                                        | Selleckchem                  | S2746                        |
| Vemurafenib                                          | Selleckchem                  | S1267                        |
| Sorafenib                                            | Selleckchem                  | S7397                        |
| 5Z-7-oxozeaneol (TAKI)                               | Selleckchem                  | 499610                       |
| Trametinib (MEKi)                                    | Selleckchem                  | S2673                        |
| 5-Fluorouracil (5-FU)                                | Accord                       | 606544.3                     |
| Irinotecan                                           | Frasenius Kabi               | 687014.3                     |
| Doxorubicin                                          | Accord                       | 174247                       |

(Continued on next page)



**Continued**

| REAGENT or RESOURCE                                                                                                                           | SOURCE                 | IDENTIFIER     |
|-----------------------------------------------------------------------------------------------------------------------------------------------|------------------------|----------------|
| Matrigel®                                                                                                                                     | Corning                | 354234         |
| 1x B27 supplement                                                                                                                             | GIBCO                  | 17504044       |
| 1x N-2 supplement                                                                                                                             | GIBCO                  | 17502048       |
| Y-27632 (ROCK inhibitor)                                                                                                                      | Sigma                  | Y0503          |
| EGF                                                                                                                                           | Sigma                  | E9644          |
| Human Noggin                                                                                                                                  | PeptoTech              | 120-10C        |
| Human R-spondin 1                                                                                                                             | PeptoTech              | 120-38         |
| Nicotinamide                                                                                                                                  | Sigma                  | N3376          |
| A8301 (ALK inhibitor)                                                                                                                         | Sigma                  | SML0788        |
| SB202190                                                                                                                                      | Sigma                  | S70677         |
| Prostaglandin E2                                                                                                                              | Tocris                 | 2296           |
| Gastrin I human                                                                                                                               | Tocris                 | 3006           |
| Ad-GFP                                                                                                                                        | Vector Biolabs         | 1060           |
| Ad-GFP-Cre                                                                                                                                    | Vector Biolabs         | 1700           |
| PhosSTOP phosphatase inhibitor cocktail                                                                                                       | Roche                  | PHOSS-RO       |
| Complete Mini protease inhibitor cocktail                                                                                                     | Roche                  | 11-836-170-001 |
| TAMRA-TelG 5'-(TTAGGG)3-3' PNA probe                                                                                                          | PNA Bio-synthesis      | F1006          |
| <b>Critical Commercial Assays</b>                                                                                                             |                        |                |
| Envision+ System HRP Labeled Polymer anti-Rabbit                                                                                              | DAKO                   | K4003          |
| Envision+ System HRP Labeled Polymer anti-Mouse                                                                                               | DAKO                   | K4001          |
| 3,3'-diaminobenzidine (DAB)                                                                                                                   | DAKO                   | K3468          |
| ProLong. Diamond with DAPI                                                                                                                    | Thermo Scientific      | P36971         |
| ECL solution                                                                                                                                  | Biological Industries  | 20-500-120     |
| ECL Prime Western Blotting Detection Reagent                                                                                                  | GE Healthcare          | RPN2232        |
| CometAssay Kit                                                                                                                                | Trevigen               | 4250-050-K     |
| DharmaFECT 1 transfection reagent                                                                                                             | Dharmacon              | T-2001-03      |
| <b>Deposited Data</b>                                                                                                                         |                        |                |
| MS data from shC and shIKK $\alpha$ in UV/non-UV HT29 cells                                                                                   | PRIDE EBI-EMBL         | PXD008932      |
| Raw data from our manuscript is available at<br><a href="http://dx.doi.org/10.17632/k6xkjc2bf7.2">http://dx.doi.org/10.17632/k6xkjc2bf7.2</a> | N/A                    | N/A            |
| <b>Experimental Models: Cell Lines</b>                                                                                                        |                        |                |
| HT29                                                                                                                                          | ATCC                   | HTB-38D        |
| WiDr                                                                                                                                          | ATCC                   | CCL-218        |
| HCT116                                                                                                                                        | ATCC                   | CCL-247        |
| LIM1215                                                                                                                                       | ECACC                  | 10092301       |
| DLD1                                                                                                                                          | ATCC                   | CCL-221        |
| SW480                                                                                                                                         | ATCC                   | CCL-228        |
| MCF7                                                                                                                                          | ATCC                   | HTB-22         |
| T24                                                                                                                                           | ATCC                   | HTB-4          |
| SKMEL131                                                                                                                                      | ATCC                   | N/A            |
| RWP1                                                                                                                                          | ATCC                   | N/A            |
| Mouse Embryonic Fibroblasts p38 $\alpha$ KO                                                                                                   | Gift from A. Nebreda.  | N/A            |
| Mouse Embryonic Fibroblasts Trf2 <sup>FL/FL</sup>                                                                                             | Gift from T. de Lange. | N/A            |
| <b>Experimental Models: Organisms/Strains</b>                                                                                                 |                        |                |
| Athymic nude, nu/nu mice                                                                                                                      | Jackson Laboratories   | 002019         |
| <b>Oligonucleotides</b>                                                                                                                       |                        |                |
| ON-TARGETplus SMART pool siRNA Chuk                                                                                                           | Dharmacon              | SO-2621140G    |
| ON-TARGETplus Non-targeting Control Pool                                                                                                      | Dharmacon              | D-001810-10    |

(Continued on next page)

**Continued**

| REAGENT or RESOURCE                                      | SOURCE      | IDENTIFIER                                                                                                                                        |
|----------------------------------------------------------|-------------|---------------------------------------------------------------------------------------------------------------------------------------------------|
| MISSION shRNA, TRCN0000000508 (human) (shIKK $\alpha$ 1) | Sigma       | N/A                                                                                                                                               |
| MISSION shRNA, TRCN0000199496 (human) (shIKK $\alpha$ 4) | Sigma       | N/A                                                                                                                                               |
| TRC2 pLKO.5-puro Nonmammalian shRNA Control              | Sigma       | SHC202                                                                                                                                            |
| MISSION shRNA, TRCN00001897 (human) (shIKK $\beta$ )     | Sigma       | N/A                                                                                                                                               |
| MISSION shRNA, TRCN000022146 (human) (shNEMO)            | Sigma       | N/A                                                                                                                                               |
| Recombinant DNA                                          |             |                                                                                                                                                   |
| pMD2.G plasmid                                           | Addgene     | #12259                                                                                                                                            |
| pCMV-dR8.2 dvpr plasmid (human)                          | Addgene     | #8455                                                                                                                                             |
| Software and Algorithms                                  |             |                                                                                                                                                   |
| GraphPad Prism 6                                         | Graphpad    | <a href="https://www.graphpad.com/">https://www.graphpad.com/</a>                                                                                 |
| Volocity 6.3                                             | PerkinElmer | <a href="http://cellularimaging.perkinelmer.com/downloads/detail.php?id=14">http://cellularimaging.perkinelmer.com/downloads/detail.php?id=14</a> |

**LEAD CONTACT AND MATERIALS AVAILABILITY**

Further information and requests for resources and reagents should be directed to and will be fulfilled by the Lead Contacts, Lluís Espinosa ([lespinosa@imim.es](mailto:lespinosa@imim.es)) and Simon J. Boulton ([simon.boulton@crick.ac.uk](mailto:simon.boulton@crick.ac.uk)).

**EXPERIMENTAL MODEL AND SUBJECT DETAILS****Animal Studies**

Fragments of human colorectal tumors obtained from MARbiobank with the informed consent of patients and following all recommendations of Hospital del Mar' Ethics Committee, the Spanish regulations, and the Helsinki declaration's Guide were transplanted and expanded in the cecum of nude mice as orthoxenografts. To perform *in vivo* drug testing, equivalent pieces of individual tumors were implanted orthotopically in the wall of the cecum of nude mice. When tumors were detectable by palpation (4-5 weeks), animals were randomly ascribed to the different groups of treatment. Vemurafenib (50mg/kg) was administered orally every day, and 5-FU and irinotecan (50mg/kg each) every 4 days intravenously. After 21 days of treatment, mice were euthanized and tumors collected, photographed, measured and processed for immunohistochemistry examination. In a parallel experiment, animals were equally treated and left for survival analysis. In all our procedures, animals were kept under pathogen-free conditions, and animal work was conducted according to the guidelines from the Animal Care Committee at the Generalitat de Catalunya. The Committee for Animal Experimentation at the Institute of Biomedical Research of Bellvitge (Barcelona) approved these studies.

**Patient-derived tumoroids**

For tumoroids generation, primary or xenografted tumors were disaggregated in 1mg/mL collagenase II (Sigma) and 20  $\mu$ g/mL hyaluronidase (Sigma), filtered in 100  $\mu$ m cell strainer, and seeded in Matrigel (BD Biosciences) as described (Sato et al., 2011). Tumoroids were expanded by serial passaging and kept frozen in liquid Nitrogen for being used in subsequent experiments. Mutations identified in the different tumors were: IMIM#1, EGFR(S464L) and TP53(I254T); IMIM#3, NRAS(Q61K), TP53(R175H), and EGFR(E928K); IMIM#5, KRAS(G12D); IMIM#6, KRAS; and IMIM#9, KRAS, NRAS and BRAF WT.

**Cell lines**

CRC cell lines LIM1215 (KRAS and BRAF wild-type), Caco2, DLD1, SW480 and HCT116 (KRAS mutated), WiDr and HT29 (BRAF mutated) were obtained from the ATCC. IKK $\alpha$  wild-type and knock out MEFs were kindly provided by Michael Karin (UCSD, La Jolla). SV40-LT-immortalized TRF2<sup>FL/FL</sup> were previously described (Celli and de Lange, 2005). All cells were grown in Dulbecco's modified Eagle's medium (Invitrogen) plus 10% fetal bovine serum (Biological Industries) and were maintained in a 5% CO<sub>2</sub> incubator at 37°C.

**METHOD DETAILS****Tumoroid viability assays**

600 single tumoroid cells were plated in 96-well plates in Matrigel. After 4 days in culture, we treated growing tumoroids with 5-FU, Irinotecan, doxorubicin, AZ628, vemurafenib or combinations for 72 hours at the indicated concentrations. Cell viability was determined using the CellTiter-Glo® 3D Cell Viability Assay (Promega) following manufacturer's instructions in an Orion II multiplate luminometer (Berthold detection systems). Data were calculated as mean  $\pm$  standard deviation from 3 independent experiments conducted in triplicates.

### Cell lysis and Western Blot (WB)

Cells were lysed 20 min at 4°C in 300  $\mu$ L of PBS plus 0.5% Triton X-100, 1 mM EDTA, 100 mM NA-orthovanadate, 0.25 mM phenylmethylsulfonyl fluoride, and complete protease inhibitor cocktail (Roche). Lysates were analyzed by western blotting using standard SDS-polyacrylamide gel electrophoresis (SDS-PAGE) techniques. In brief, protein samples were boiled in Laemmli buffer, run in polyacrylamide gels, and transferred onto polyvinylidene difluoride membranes. The membranes were incubated overnight at 4°C with the appropriate primary antibodies. After being washed, the membranes were incubated with specific secondary horseradish peroxidase-linked antibodies from Dako and visualized using the enhanced chemiluminescence reagent from Amersham.

### Cell fractionation

For cytoplasm/nuclear/chromatin separations, cells were lysed in 10 mM HEPES, 1.5 mM  $MgCl_2$ , 10 mM KCl, and 0.05% NP-40 (pH 7.9) for 10 min on ice and centrifuged at 3,000 rpm. Supernatants were recovered as the cytoplasmic fraction, and the pellets were lysed in 5 mM HEPES, 1.5 mM  $MgCl_2$ , 0.2 mM EDTA, 0.5 mM dithiothreitol, and 26% glycerol and sonicated for 5 min three times to recover the soluble nuclear fractions. The remaining pellet included the chromatin fraction. Lysates were run in SDS-PAGE and transferred onto Immobilon-P transfer membranes (Millipore) for western blot analysis.

### Immunoprecipitation Assay

For precipitation assay, control and UV-treated cells were crosslinked with dithiobis succinimidyl propionate (DSP, Pierce) 10 min at room temperature and then disrupted in RIPA buffer plus protease inhibitor cocktail (Roche). Cells were then centrifuged at 13,000 rpm for 15 min, and supernatants were incubated with 5  $\mu$ g of anti- $IKK\alpha$ (p45) antibody. Precipitates were captured with 35 mL of protein A-Sepharose, extensively washed, and analyzed by WB. In most of the experiments, we used the Clean-Blot IP Detection Kit as secondary antibody.

### Immunohistochemical Staining (IHC)

Tissues were fixed in 4% formaldehyde overnight at room temperature and embedded in paraffin. 4  $\mu$ m paraffin embedded sections were first deparaffinized in xylene. IHC was performed following standard techniques with EDTA- or citrate-based antigen retrieval and developed with the Envision+ System HRP Labeled Polymer anti-Rabbit or anti-Mouse and 3,3'-diaminobenzidine (DAB) from DAKO. Images were obtained with an Olympus BX61 microscope.

### Immunofluorescence (IF) analysis

For cell lines and tumoroid immune-fluorescence, cells were directly fixed with 4% paraformaldehyde, permeabilized with 0.3% Triton X-100 (Pierce), washed and incubated overnight with the corresponding primary antibodies. Secondary antibodies were the Alexa Fluor™ from Invitrogen. ProLong™ Diamond Antifade Mountant plus DAPI was used as mounting medium. Images were taken in an SP5 upright confocal microscope (Leica).

### Peptide Nucleic Acid (PNA) Fluorescence *In Situ* Hybridization (FISH) and IF-FISH

Cells were treated with 0.2  $\mu$ g/ml of colcemid for 90 minutes to arrest cells in metaphase. Trypsinized cells were incubated in 75 mM KCL, fixed with methanol:acetic acid (3:1), and spread on glass slides. To preserve chromosome architecture the slides were rehydrated in PBS for 5 minutes, fixed in 4% formaldehyde for 5 minutes, treated with 1 mg/ml of pepsin for 10 minutes at 37°C, and fixed in 4% formaldehyde for 5 minutes. Next, slides were dehydrated in 70%, 85%, and 100% (v/v) ethanol for 15 minutes each and then air-dried. Metaphase chromosome spreads were hybridized with telomeric TAMRA-TelG 5'-(TTAGGG)3-3' PNA probe (Bio-synthesis) and slides were mounted using ProLong Gold antifade with DAPI (Life Technologies). Chromosome images and telomere signals were captured using Zeiss Axio Imager M1 microscope equipped with an ORCA-ER camera (Hamamatsu) controlled by Volocity 6.3 software (Improvision). For IF-FISH, cells grown on #1.5 glass coverslips were fixed for 5 minutes in cold methanol. Cells were washed twice for 5 min in PBS, incubated for 30 min in blocking solution (1 mg/ml BSA, 3% goat serum, 0.1% Triton X-100, 1 mM EDTA in PBS), and then incubated overnight with primary antibody against 53BP1 and secondary antibody anti-rabbit Alexa Fluor 488 secondary antibody for 1 hr and 30 min, in blocking solution with 5 min washes in PBS in-between. After dehydration of the cells, FISH experiments were performed as described above. Slides were mounted with ProLong Gold antifade containing DAPI and images were acquired with an Olympus FLV1000 inverted microscope equipped with a 63X oil objective.

### Laser microirradiation induced DNA damage

HT29 cells were seeded on 35 mm glass bottom dish (Ibidi, 81158) and pre-sensitized for 48h with 10  $\mu$ M BrdU. Cells were transferred to Olympus FV1000 confocal LSM with heated stage. Laser microirradiation was performed in a stripe shape with a 405 nm laser focused through 40x objective (400mW at objective, 50 scans). 1 hour after DNA damage induction, cells were fixed and processed for IF.

### Knock down and knock out assays

Lentiviral particles including shRNAs against IKK subunits were obtained from Sigma (table). The TRC2 pLKO.5-puro non-mammalian shRNA plasmid (SHC202) was used as negative control. siRNAs employed were ON-TARGET plus siRNA SMARTpool purchased

from GE Dharmacon. RNA interference (RNAi) transfections were performed using Dharmafect Transfection Reagent (Dharmacon) in a forward transfection mode using manufacturer's guidelines.

Deletion of floxed alleles in *Trf2*<sup>FL/FL</sup> cells was carried out with either Ad-GFP or Ad-GFP-Cre adenovirus (Vector Biolabs, ref. 1060 and 1700) and checked by WB.

### Cell cycle analysis

Cell cycle was determined by flow cytometry using the standard Propidium Iodide staining-based protocol in the LSR-Fortessa analyzer (BD Biosciences).

### Comet Assay

Comet assays were performed using CometAssay® Trevigen Kit (4250-050-K) following manufacturer's instructions. Pictures were taken using a Nikon Eclipse Ni-E epifluorescence microscope and tail moment was calculated using the OPENCOMET plugin for Fiji.

### Kinase Assay

*In vitro* kinase assays were performed as previously described (Espinosa et al., 2003). In brief, 5 µg of GST or GST-ATM (Aa1911-2063) were incubated with 200 ng of recombinant human IKKα (ab102103) or 10 µg of cell lysates from WT or IKKα KO cells at 30°C for 30 minutes in the presence of ATP-γP<sup>32</sup>. Reactions were stopped by adding loading buffer, run in a polyacrylamide gel and developed in autoradiograph film.

### Mass Spectrometry Analysis

Cell lysates obtained in the different experimental conditions were processed and digested with trypsin and endoproteinase LysC with a ratio enzyme:sample of 1:10 for both enzymes (w:w). Samples were then subjected to phospho-peptide enrichment using titanium dioxide (TiO<sub>2</sub>) beads, and phospho-enriched samples were analyzed by LC-MS/MS. To identify IKKα-dependent phospho-peptides, samples were injected with a 120-minute chromatographic gradient in an Orbitrap Velos Pro with a data-dependent acquisition method using CID fragmentation for the top 20 most intense precursor ions and multistage activation. In the UV-activation experiment, samples were acquired with a 90-minute gradient in an Orbitrap Fusion Lumos with a data-dependent acquisition method using top speed, HCD fragmentation and ion-trap detection. In both cases, the resulting data were analyzed with the Proteome Discoverer software v1.4, using the search algorithm Mascot (v2.5) against a Human protein database (Uniprot, v2015) with oxidation (Met), and phosphorylation (Ser, Thr, Tyr) as variable modifications. Carbamidomethylation (Cys) was set as fixed modification and a mass tolerance of 7 ppm (MS1) and 0.5 Da (MS2) were used. Only peptides with a false discovery rate below 5% were considered for quantitative analysis. Peptides relative abundance was estimated with the area under the curve of extracted ion chromatograms. Protein network was generated using cytoscape software (<https://cytoscape.org>).

## QUANTIFICATION AND STATISTICAL ANALYSIS

Statistical parameters, including number of events quantified, standard deviation, and statistical significance are reported in the figures and in the figure legends. Statistical analysis has been performed using GraphPad Prism6 software (GraphPad) and  $p < 0.05$  is considered significant. Two-sided Student's t test was used to compare differences between two groups and Two-Way ANOVA test was used to compare differences among multiple groups. Each experiment has been repeated at least twice.

## DATA AND CODE AVAILABILITY

MS data are available at PRIDE EBI-EMBL database with identifier PRIDE: PXD008932.

Row data from our manuscript is available at <https://doi.org/10.17632/k6xkjc2bf7.1>

**Molecular Cell, Volume 75**

**Supplemental Information**

**IKK $\alpha$  Kinase Regulates the DNA Damage Response  
and Drives Chemo-resistance in Cancer**

**Carlota Colomer, Pol Margalef, Alberto Villanueva, Anna Vert, Irene Pecharroman, Laura Solé, Mónica González-Farré, Josune Alonso, Clara Montagut, Maria Martinez-Iniesta, Joan Bertran, Eva Borràs, Mar Iglesias, Eduard Sabidó, Anna Bigas, Simon J. Boulton, and Lluís Espinosa**

**Figure S1.**

**A**

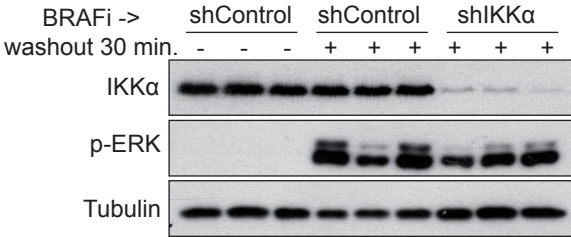

**B**

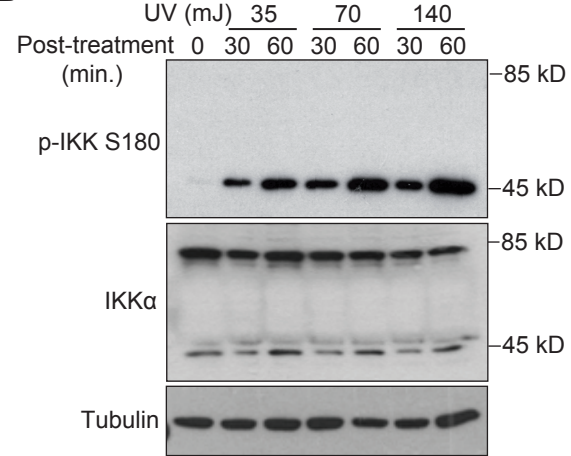

**Fig S1. Related to Figure 1.** (A) Western blot (WB) analysis of the HT29 cells used in the MS analysis transduced with sh-RNA control or sh-RNA against IKK $\alpha$ . All cell were treated with BRAF inhibitor for 16 hours, washed out (when indicated) and collected 30 minutes after BRAF inhibition release. (B) WB analysis of HT29 cells treated with the indicated doses of UV light and collected 30 or 60 minutes after exposure.

**Figure S2.**

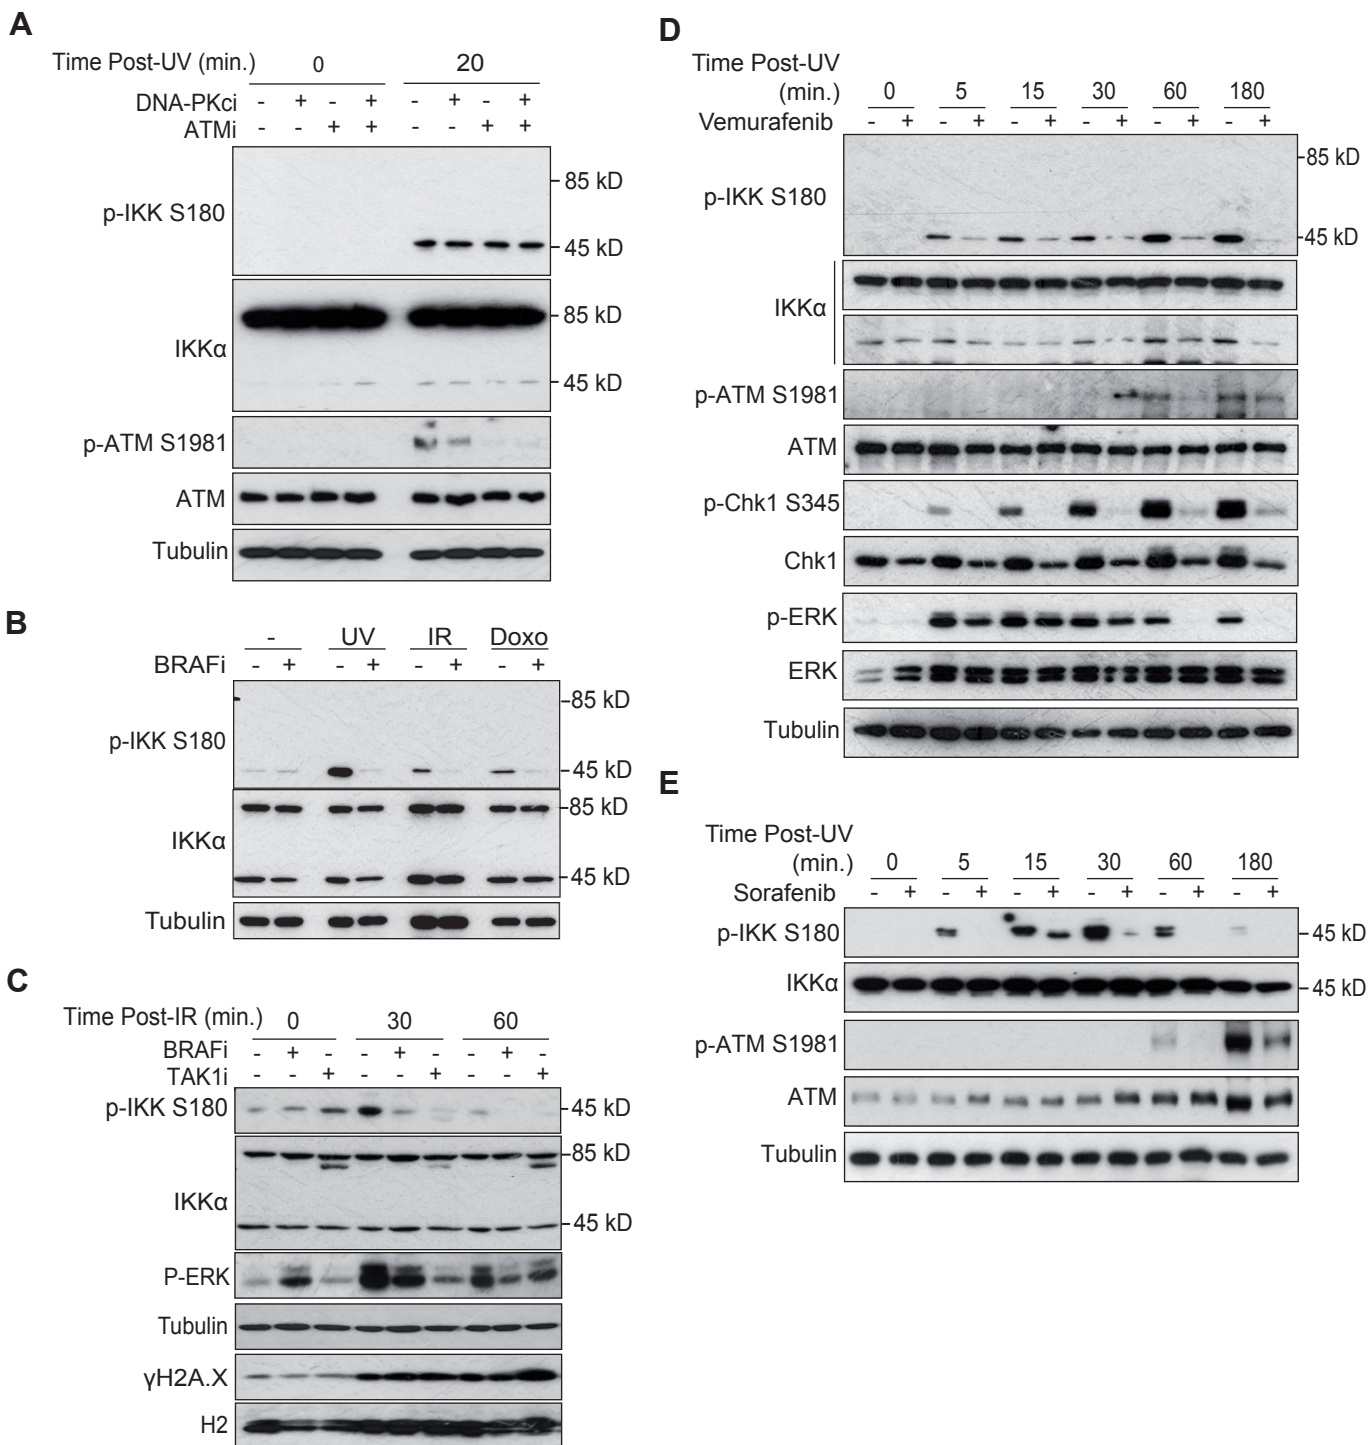



**Fig. S2. Related to Figure 2.** (A) WB analysis of HT29 cells treated for 16 hours with ATM and/or DNA-PKc inhibitors as indicated. (B) WB analysis of HT29 cells pretreated with the BRAF inhibitor AZ628 (16 hours, 10 $\mu$ M) and then exposed to the indicated damaging agents. (C) WB analysis of HT29 cells pretreated with the BRAF or TAK1 inhibitors for 16 hours and then exposed to IR for the indicated times. (D-E) WB analysis of HT29 cells treated with the BRAF inhibitors vemurafenib (16 hours, 10 $\mu$ M) (D) or sorafenib (16 hours, 1 $\mu$ M) (E) prior to exposure to UV light for the indicated time points.

**Figure S3.****A**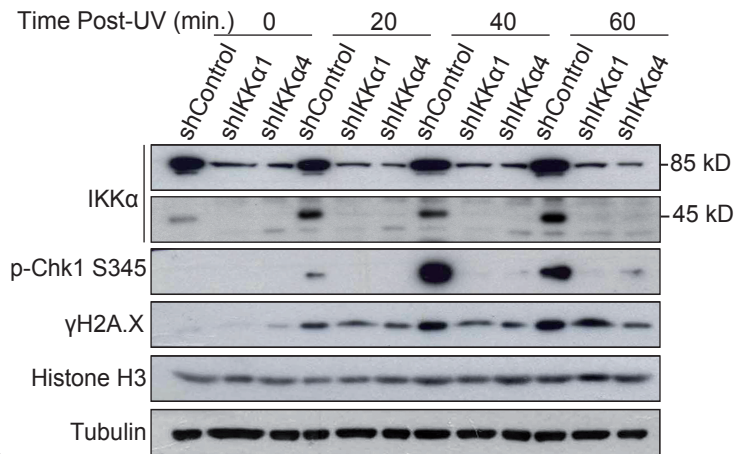**C**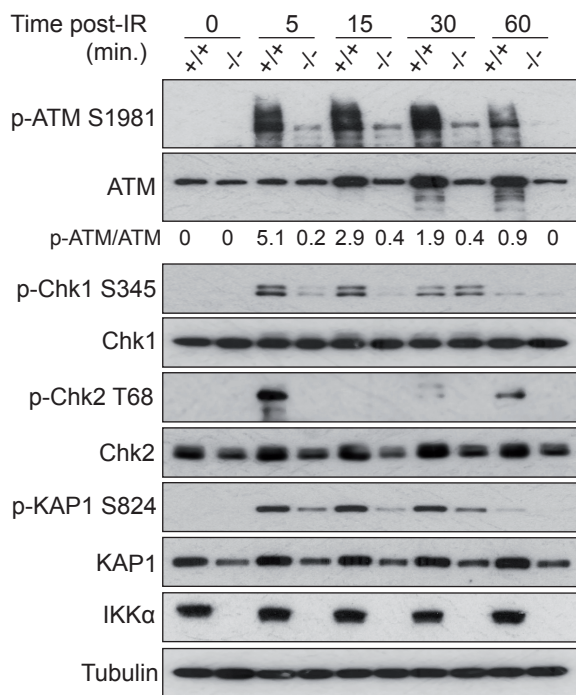**F**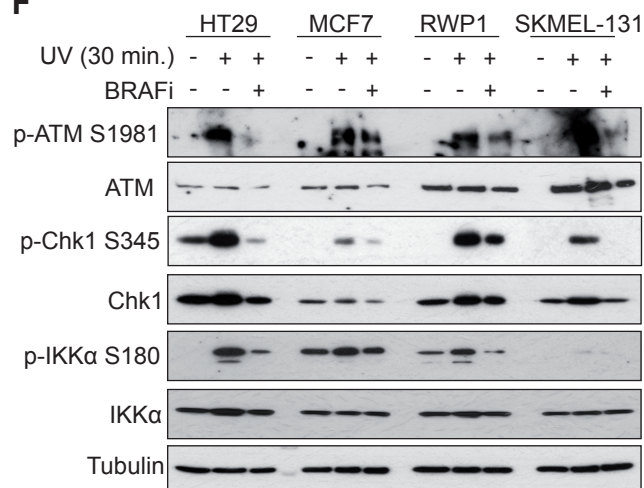**G**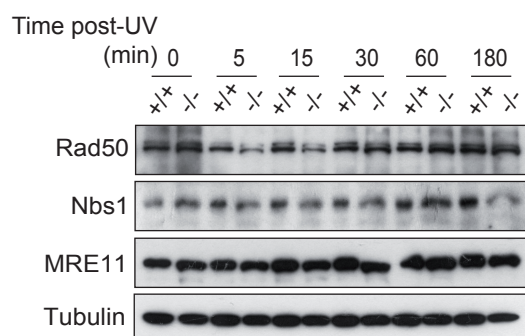**B**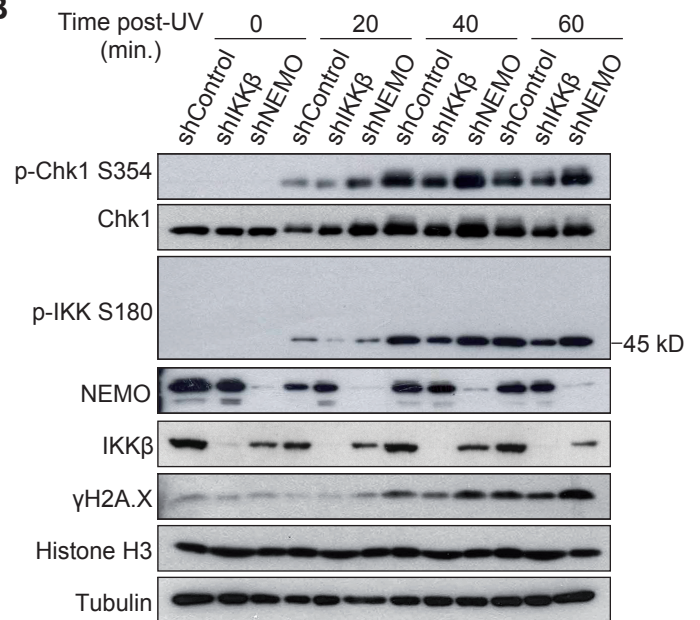**D**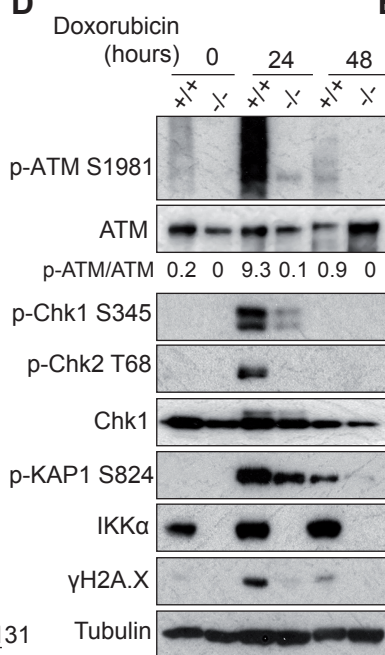**E**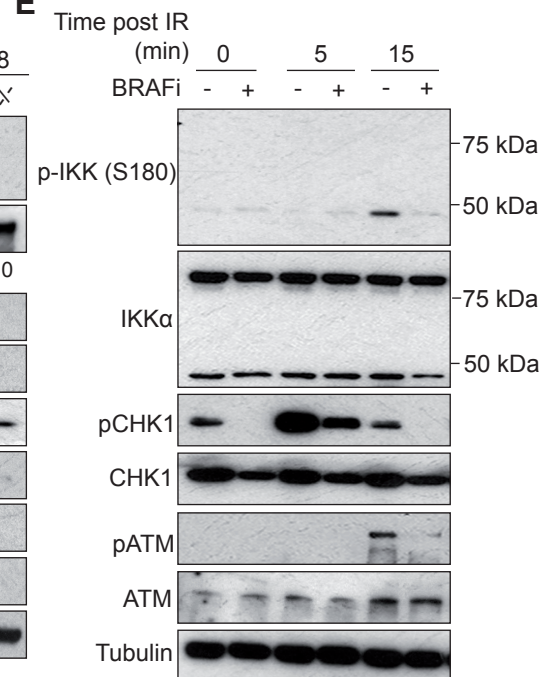**H**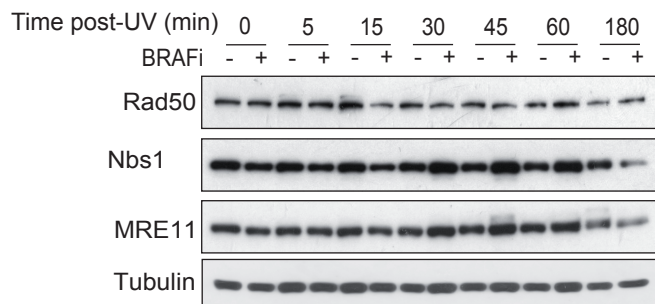**I**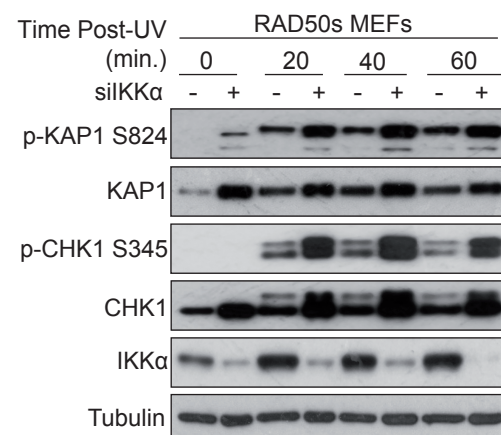

**Fig. S3. Related to Figure 3.** (A) WB analysis of HT29 cells transduced with shRNA control or 2 different IKK $\alpha$ -specific shRNAs, exposed to UV and collected at the indicated time points. (B) WB analysis of HT29 cells transduced with sh-RNA control or specific shRNAs against IKK $\beta$  and NEMO exposed to UV light and collected at the indicated time points. (C-D) WB analysis of *IKK $\alpha$*  WT (+/+) and *IKK $\alpha$*  KO (-/-) treated with IR (2Gy) (C) or doxorubicin (4  $\mu$ g/ml) (D) and collected at the indicated time points. (E) WB analysis of HT29 cells pretreated for 16 hours with AZ628 and then exposed to IR as indicated. (F) WB analysis of different cancer cell lines pretreated as in E and then exposed to UV light. (G-H) WB analysis of the indicated MRN elements in *IKK $\alpha$*  WT (+/+) and KO (-/-) control or UV-treated MEFs (G) or BRAF inhibitor-treated HT29 cells (H). (I) WB analysis of control and *IKK $\alpha$* -knocked down RAD50s MEFs treated as indicated.

**Figure S4.**

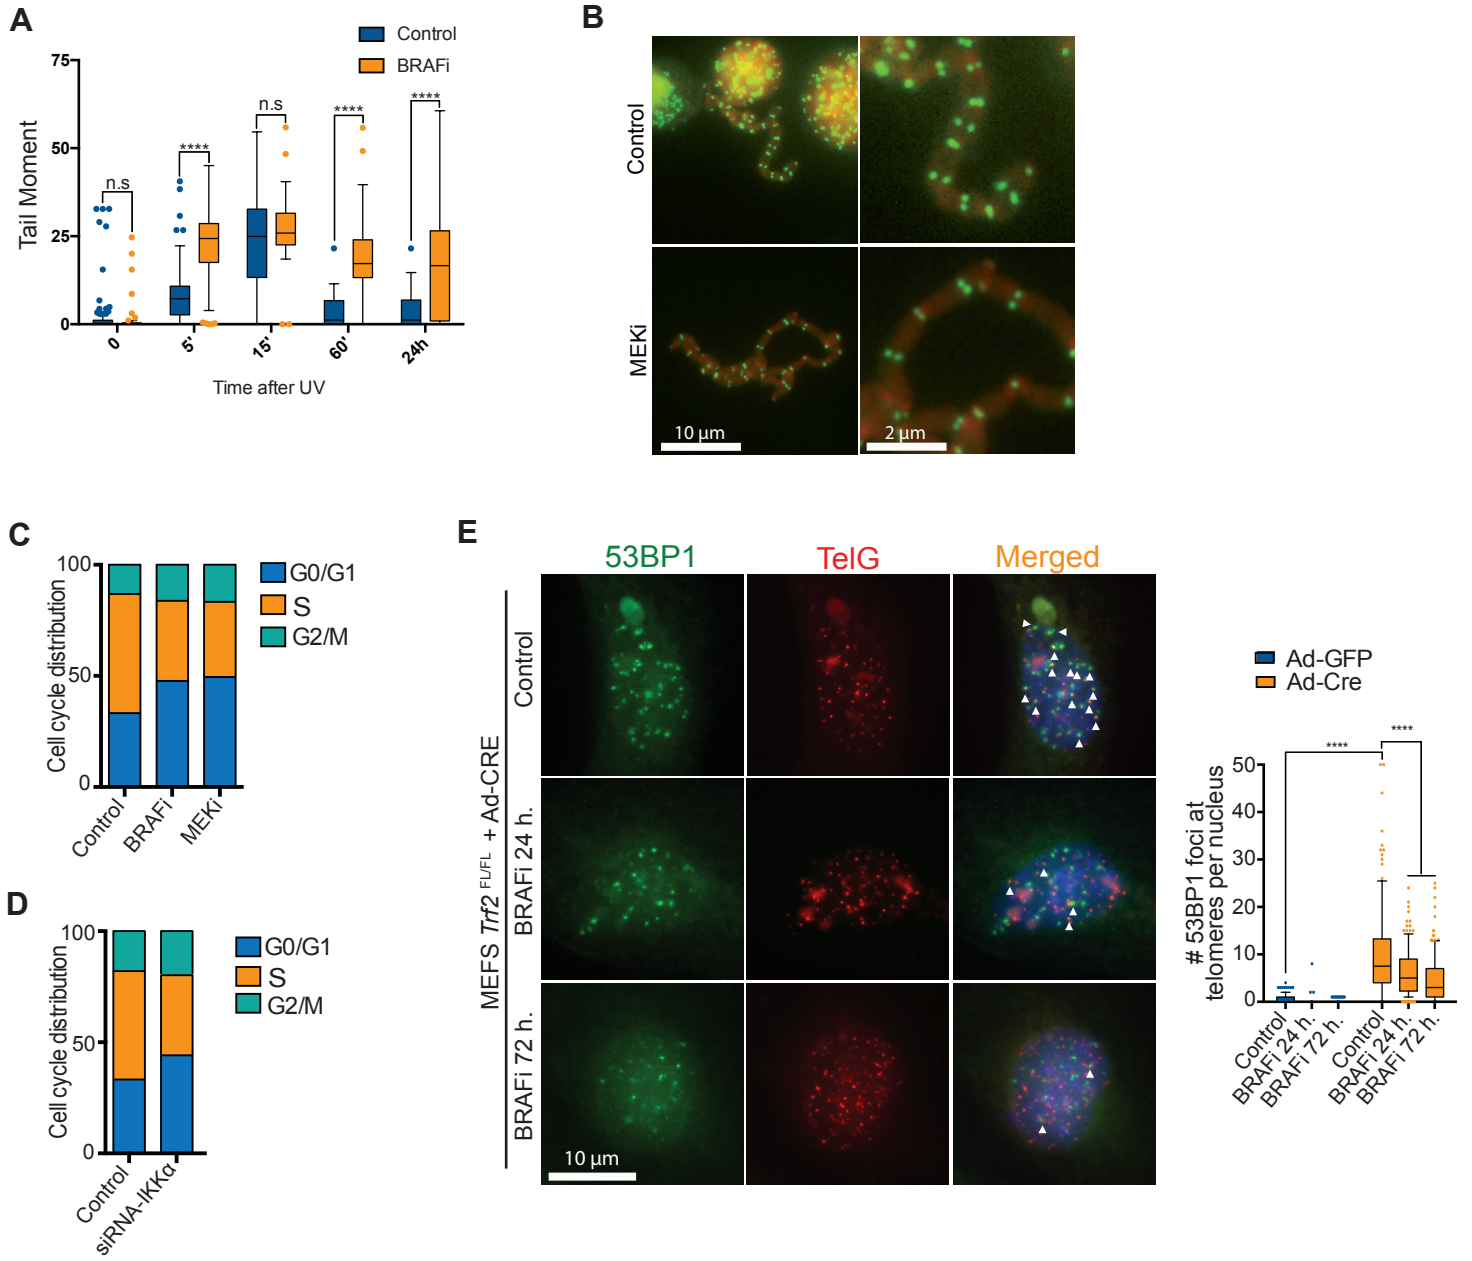

**Fig. S4. Related to Figure 4.** (A) Comet Assay of HT29 cells treated with AZ628 10 $\mu$ M (BRAFi) at the indicated time points after UV light (130mJ) (B) Representative images of FISH analysis from control and MEK-inhibited *Trf2* deficient cells using a telomeric probe (in green). (C-D) Cell cycle profiles of *Trf2* deficient cells treated as indicated (C) or transfected with specific siRNA against IKK $\alpha$  (D). (E) IF followed by telomeric FISH of *Trf2* deficient MEFs control or treated with BRAF inhibitor 24 or 72 hours. Quantification of 53BP1 colocalizing with telomeres is shown in the right panel. For statistical analysis in A, two-way ANOVA was used and the p-values are indicated as \*\*\*\* $p$ <0.0001.

**Figure S5.**

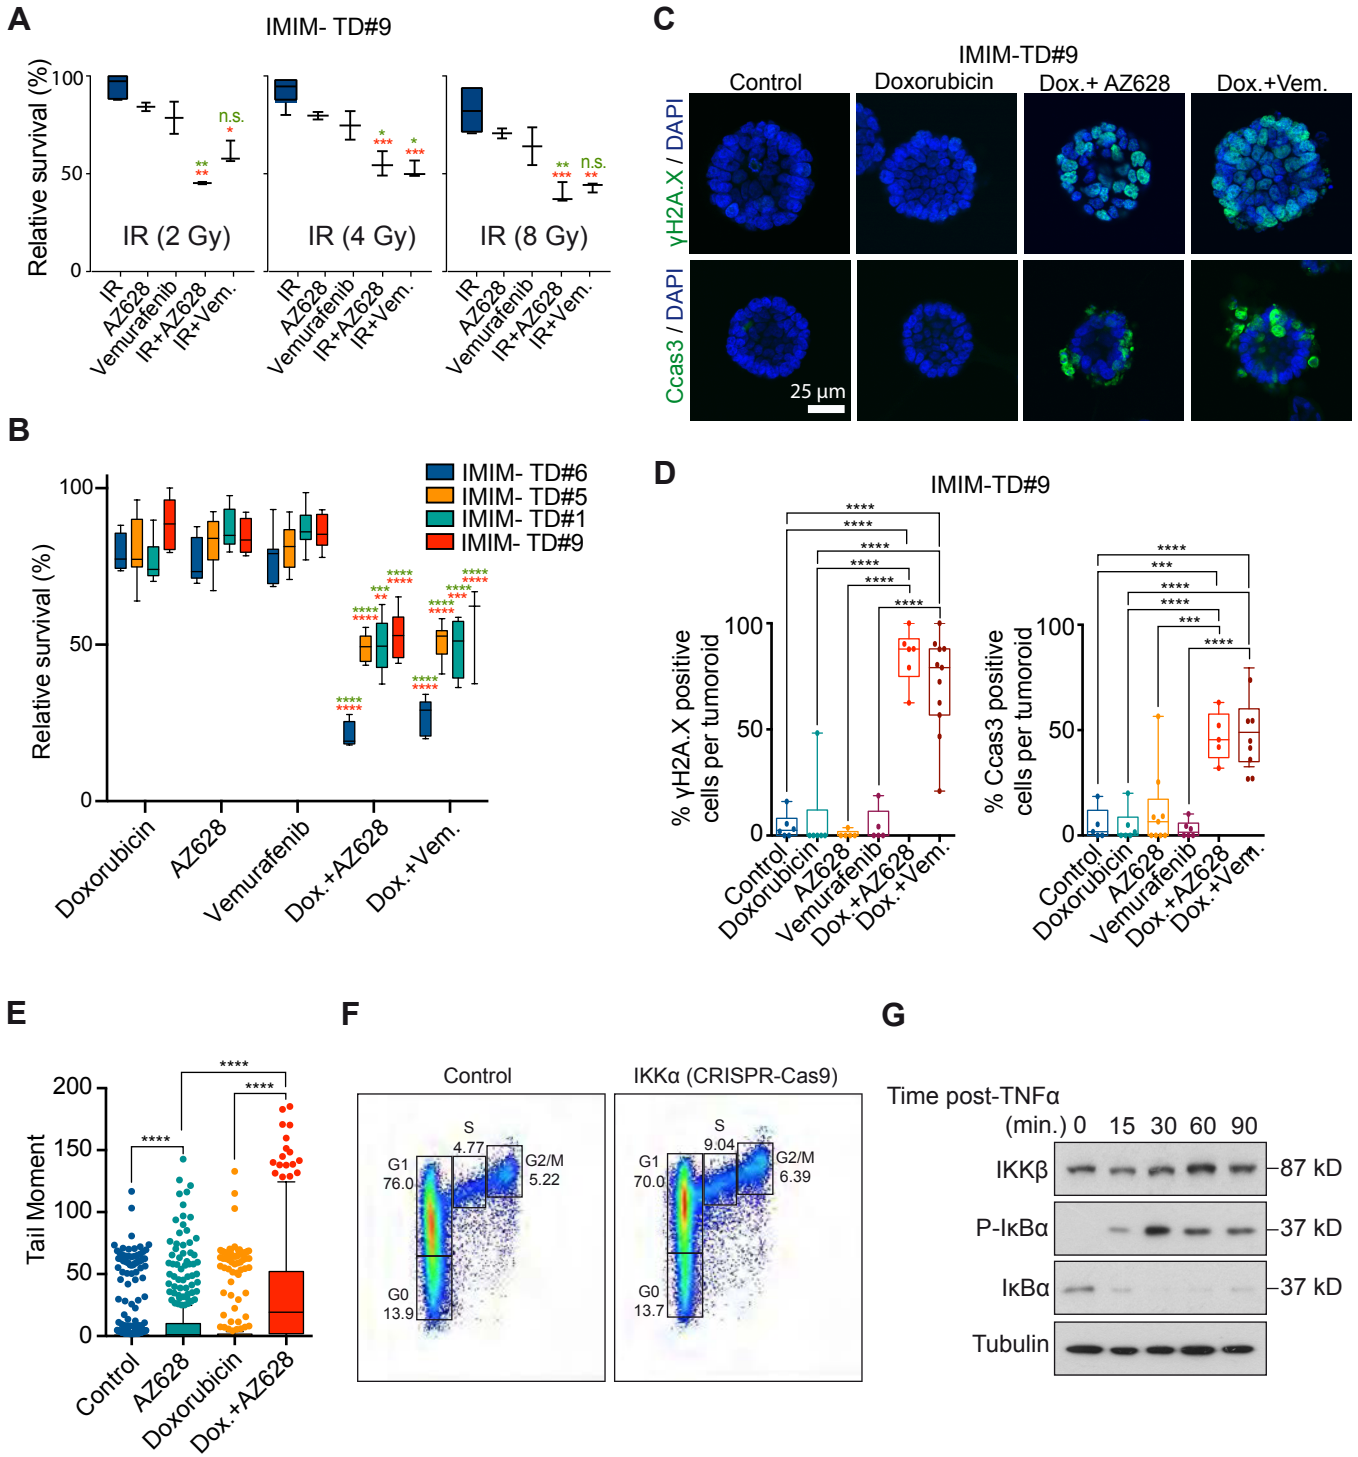

**Fig. S5. Related to Figure 5. (A-B)** Quantification of cell viability by CellTiter-Glo 3D cell viability assay in the indicated tumoroids after 72 hours of treatment at different doses of  $\gamma$ -irradiation (A) or drug combinations (B). **(C-D)** Representative images of  $\gamma$ H2A.X and cleaved caspase 3 IF in a representative tumoroid treated as indicated (C) and quantification of the percent of positive cells from 20 tumoroids per condition counted (D). **(E)** Comet Assay quantification from tumoroid IMIM-TD#9 treated with the indicated treatments for 24h. **(F)** Cell cycle profiles of the same tumoroid after CRISPR-Cas9-mediated IKK $\alpha$  depletion. **(G)** WB analysis of IKK $\alpha$ -depleted IMIM-TD#9 treated with TNF $\alpha$  as indicated. Statistical analysis in A, B, D and E was performed by unpaired t-test. In A and B comparison of compound treatments with single IR/Dox or BRAF inhibitors are shown in red and green, respectively. p-values are indicated as n.s.=non-significant, \* $p$ <0.05, \*\* $p$ <0.01, \*\*\* $p$ <0.001, \*\*\*\* $p$ <0.0001. In the legends Vem, vemurafenib; Dox, doxorubicin and IR,  $\gamma$ -radiation.

**Figure S6.**

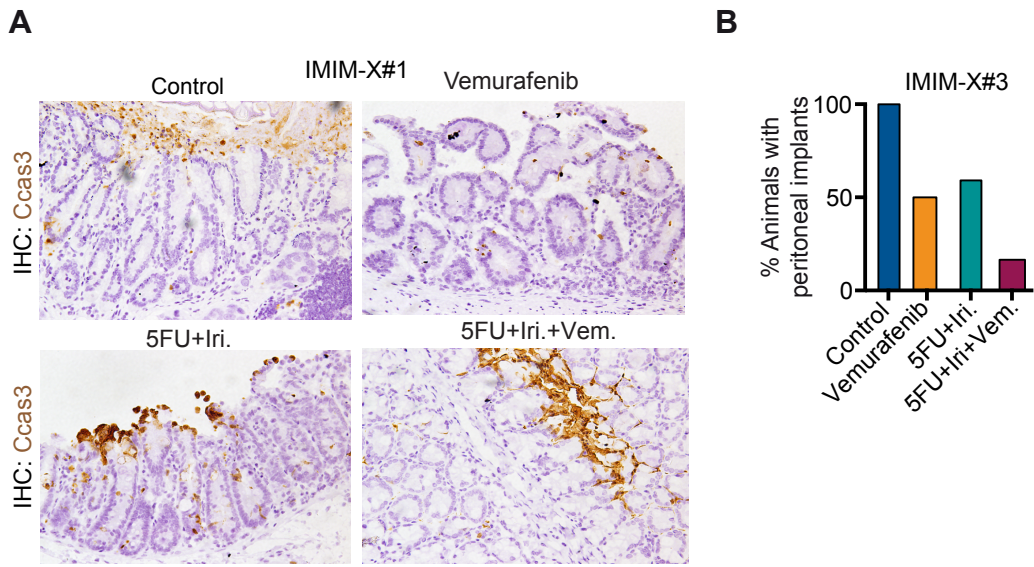



**Fig. S6. Related to Figure 6.** (A) Cleaved caspase 3 staining of normal colonic tissue from the indicated treated animals. (B) Graph indicating the percent of animals with detectable peritoneal implant in each group of treatment. In the figure: Vem, vemurafenib; 5FU, 5-fluorouracil; Dox, doxorubicin and Iri, irinotecan.
